# Supplementary material
Source: MDPI journal article supplement (https://www.mdpi.com/2813-446X/1/1/5)
Supplement: s1 [file s1]

# Supplementary Material

## Barrier to Methyl Internal Rotation and Equilibrium Structure Determined from the Microwave Spectrum of 2-Methylthiophene

Kenneth J. Koziol,<sup>a,b,\*</sup> Hamza El Hadki,<sup>a,c</sup> Arne Lüchow,<sup>b</sup> Natalja Vogt,<sup>d</sup> Jean Demaison,<sup>e</sup> and Ha Vinh Lam Nguyen,<sup>a,f,\*</sup>

<sup>a</sup> *Univ Paris Est Creteil and Université Paris Cité, CNRS, LISA, 94010 Créteil, France*

<sup>b</sup> *Institute of Physical Chemistry, RWTH Aachen University, Landoltweg 2, D-52074 Aachen, Germany*

<sup>c</sup> *Laboratory of Spectroscopy, Molecular Modeling, Materials, Nanomaterials, Water, and Environment, Mohammed V University, Faculty of Sciences, Av Ibn Battouta, B.P. 1014, Rabat, Morocco*

<sup>d</sup> *Section of Chemical Information systems, University of Ulm, Albert-Einstein-Allee 47, Ulm 89081, Germany*

<sup>e</sup> *Université de Lille, 59000 Lille, France*

<sup>f</sup> *Institut Universitaire de France (IUF), 1 Rue Descartes, 75231 Paris, France*

\* Corresponding authors. E-Mail: [kenneth.koziol@lisa.ipsl.fr](mailto:kenneth.koziol@lisa.ipsl.fr), [lam.nguyen@lisa.ipsl.fr](mailto:lam.nguyen@lisa.ipsl.fr)

**Table S1:** Nuclear coordinates of 2MTP in the principal axis system calculated at the MP2/6-311++G(d,p) level of theory. The atoms are numbered according to Figure 1.

|     | a / Å     | b / Å     | c / Å     |
|-----|-----------|-----------|-----------|
| S1  | -0.193422 | -1.148581 | 0.000000  |
| C2  | 0.815087  | 0.250550  | -0.000001 |
| C3  | -0.046599 | 1.400304  | 0.000000  |
| C4  | -1.352303 | 1.140712  | -0.000000 |
| C5  | -1.631006 | -0.211041 | 0.000001  |
| H6  | -2.598140 | -0.696395 | -0.000001 |
| H7  | -2.120970 | 1.905565  | 0.000001  |
| H8  | 0.485457  | 2.392801  | -0.000000 |
| C9  | 2.312266  | 0.144727  | 0.000000  |
| H10 | 2.681240  | -0.381503 | -0.885957 |
| H11 | 2.681237  | -0.381518 | 0.885950  |
| H12 | 2.743714  | 1.149342  | 0.000009  |

**Table S2:** Equilibrium rotational constants  $A$ ,  $B$ ,  $C$  and the  $V_3$  torsional barrier for 2MTP calculated at different levels of theory and their deviations to the experimental values  $\Delta A$ ,  $\Delta B$ ,  $\Delta C$ .  $\Sigma\Delta$  is the sum of the absolute values of  $\Delta A$ ,  $\Delta B$ ,  $\Delta C$ .

| Method/Basis Set             | $A$<br>MHz | $\Delta A$<br>MHz | $B$<br>MHz | $\Delta B$<br>MHz | $C$<br>MHz | $\Delta C$<br>MHz | $\Sigma\Delta$<br>MHz | $V_3$<br>cm <sup>-1</sup> | $\Delta V_3$<br>cm <sup>-1</sup> |
|------------------------------|------------|-------------------|------------|-------------------|------------|-------------------|-----------------------|---------------------------|----------------------------------|
| MP2/6-31G(d,p)               | 5269.9     | 30.0              | 3119.3     | -5.2              | 1983.5     | 1.7               | 36.9                  | 208.1                     | 10.4                             |
| MP2/6-31+G(d,p)              | 5260.4     | 39.5              | 3113.8     | 0.3               | 1980.0     | 5.2               | 45.0                  | 183.7                     | -14.0                            |
| MP2/6-31++G(d,p)             | 5260.2     | 39.6              | 3113.7     | 0.4               | 1980.0     | 5.3               | 45.3                  | 183.0                     | -14.7                            |
| MP2/6-311G(d,p)              | 5265.0     | 34.9              | 3115.9     | -1.8              | 1981.7     | 3.5               | 40.2                  | 208.0                     | 10.3                             |
| MP2/6-311+G(d,p)             | 5265.2     | 34.7              | 3110.6     | 3.5               | 1979.6     | 5.6               | 43.8                  | 183.7                     | -14.1                            |
| MP2/6-311++G(d,p)            | 5265.2     | 34.7              | 3110.6     | 3.5               | 1979.6     | 5.6               | 43.8                  | 183.0                     | -14.7                            |
| MP2/6-311G(df,pd)            | 5311.3     | -11.5             | 3134.0     | -19.9             | 1995.5     | -10.2             | 41.7                  | 210.0                     | 12.3                             |
| MP2/6-311+G(df,pd)           | 5308.5     | -8.7              | 3130.0     | -15.9             | 1993.5     | -8.2              | 32.8                  | 184.6                     | -13.1                            |
| MP2/6-311++G(df,pd)          | 5307.9     | -8.1              | 3129.7     | -15.6             | 1993.3     | -8.0              | 31.7                  | 181.0                     | -16.7                            |
| MP2/6-311G(2d,2p)            | 5276.9     | 22.9              | 3118.3     | -4.2              | 1984.0     | 1.3               | 28.4                  | 168.7                     | -29.0                            |
| MP2/6-311+G(2d,2p)           | 5275.4     | 24.4              | 3117.1     | -3.0              | 1983.3     | 2.0               | 29.4                  | 173.6                     | -24.1                            |
| MP2/6-311++G(2d,2p)          | 5275.2     | 24.6              | 3117.1     | -3.0              | 1983.3     | 2.0               | 29.6                  | 171.2                     | -26.5                            |
| MP2/6-311G(2df,2pd)          | 5320.6     | -20.8             | 3133.3     | -19.2             | 1996.3     | -11.0             | 51.0                  | 151.5                     | -46.2                            |
| MP2/6-311+G(2df,2pd)         | 5318.6     | -18.7             | 3131.4     | -17.3             | 1995.3     | -10.0             | 46.0                  | 157.7                     | -40.0                            |
| MP2/6-311++G(2df,2pd)        | 5318.1     | -18.3             | 3131.4     | -17.3             | 1995.2     | -9.9              | 45.5                  | 159.9                     | -37.8                            |
| MP2/6-311G(3df,3pd)          | 5336.5     | -36.6             | 3135.0     | -20.9             | 1999.3     | -14.0             | 71.5                  | 121.9                     | -75.8                            |
| MP2/6-311+G(3df,3pd)         | 5334.2     | -34.3             | 3133.9     | -19.8             | 1998.5     | -13.2             | 67.3                  | 135.2                     | -62.5                            |
| MP2/6-311++G(3df,3pd)        | 5334.0     | -34.1             | 3133.8     | -19.7             | 1998.5     | -13.2             | 67.0                  | 137.0                     | -60.7                            |
| MP2/cc-pVDZ                  | 5198.3     | 101.6             | 3081.3     | 32.8              | 1958.6     | 26.7              | 161.0                 | 203.3                     | 5.5                              |
| MP2/cc-pVTZ                  | 5305.9     | -6.0              | 3126.8     | -12.7             | 1991.6     | -6.4              | 25.1                  | 169.2                     | -28.5                            |
| MP2/aug-cc-pVDZ              | 5185.7     | 114.2             | 3072.7     | 41.4              | 1953.3     | 31.9              | 187.5                 | 188.2                     | -9.6                             |
| MP2/aug-cc-pVTZ              | 5305.3     | -5.5              | 3124.6     | -10.5             | 1990.7     | -5.5              | 21.5                  | 149.1                     | -48.7                            |
| M06-2X/6-31G(d,p)            | 5287.9     | 11.9              | 3113.8     | 0.3               | 1984.0     | 1.3               | 13.5                  | 254.5                     | 56.7                             |
| M06-2X/6-31+G(d,p)           | 5282.1     | 17.7              | 3110.9     | 3.2               | 1982.1     | 3.2               | 24.1                  | 250.0                     | 52.3                             |
| M06-2X/6-31++G(d,p)          | 5282.1     | 17.8              | 3111.0     | 3.1               | 1982.1     | 3.2               | 24.1                  | 248.6                     | 50.9                             |
| M06-2X/6-311G(d,p)           | 5298.3     | 1.5               | 3119.9     | -5.8              | 1987.9     | -2.6              | 10.0                  | 236.0                     | 38.3                             |
| M06-2X/6-311+G(d,p)          | 5299.0     | 0.9               | 3118.0     | -3.9              | 1987.2     | -2.0              | 6.8                   | 241.3                     | 43.6                             |
| M06-2X/6-311++G(d,p)         | 5298.7     | 1.1               | 3118.0     | -3.9              | 1987.2     | -1.9              | 6.9                   | 245.2                     | 47.5                             |
| M06-2X/6-311G(df,pd)         | 5315.6     | -15.7             | 3127.7     | -13.6             | 1993.4     | -8.2              | 37.5                  | 234.7                     | 37.0                             |
| M06-2X/6-311+G(df,pd)        | 5316.5     | -16.6             | 3125.8     | -11.7             | 1992.8     | -7.5              | 35.8                  | 237.3                     | 39.6                             |
| M06-2X/6-311++G(df,pd)       | 5316.3     | -16.4             | 3125.8     | -11.7             | 1992.7     | -7.5              | 35.6                  | 240.6                     | 42.8                             |
| M06-2X/6-311G(3df,3pd)       | 5355.6     | -55.7             | 3136.1     | -22.0             | 2002.4     | -17.1             | 94.9                  | 194.1                     | -3.6                             |
| M06-2X/6-311+G(3df,3pd)      | 5354.9     | -55.0             | 3135.7     | -21.7             | 2002.1     | -16.9             | 93.6                  | 204.6                     | 6.8                              |
| M06-2X/6-311++G(3df,3pd)     | 5354.7     | -54.9             | 3135.7     | -21.6             | 2002.1     | -16.8             | 93.3                  | 205.3                     | 7.5                              |
| M06-2X/cc-pVDZ               | 5267.9     | 31.9              | 3106.9     | 7.2               | 1978.6     | 6.6               | 45.8                  | 233.5                     | 35.7                             |
| M06-2X/cc-pVTZ               | 5336.8     | -36.9             | 3130.9     | -16.8             | 1997.6     | -12.3             | 66.0                  | 212.4                     | 14.6                             |
| M06-2X/aug-cc-pVDZ           | 5269.7     | 30.1              | 3105.8     | 8.3               | 1978.4     | 6.9               | 45.2                  | 235.6                     | 37.9                             |
| M06-2X/aug-cc-pVTZ           | 5338.5     | -38.7             | 3130.9     | -16.8             | 1997.9     | -12.6             | 68.2                  | 216.2                     | 18.5                             |
| MP2-CCSD/cc-pVDZ             | 5168.0     | 131.8             | 3066.5     | 47.6              | 1948.4     | 36.9              | 216.3                 | 242.8                     | 45.1                             |
| MP2-CCSD/cc-pVTZ             | 5305.9     | -6.0              | 3126.8     | -12.7             | 1991.6     | -6.4              | 25.1                  |                           |                                  |
| $\omega$ B97X-D/6-31G(d,p)   | 5286.4     | 13.4              | 3108.8     | 5.3               | 1981.8     | 3.5               | 22.2                  | 247.8                     | 50.0                             |
| $\omega$ B97X-D/6-31+G(d,p)  | 5281.1     | 18.7              | 3106.5     | 7.6               | 1980.1     | 5.1               | 31.5                  | 246.0                     | 48.3                             |
| $\omega$ B97X-D/6-31++G(d,p) | 5281.0     | 18.8              | 3106.6     | 7.5               | 1980.2     | 5.1               | 31.5                  | 245.4                     | 47.7                             |
| $\omega$ B97X-D/6-311G(d,p)  | 5300.3     | -0.5              | 3117.7     | -3.6              | 1987.3     | -2.1              | 6.1                   | 230.2                     | 32.5                             |

|                                   | $A$    | $\Delta A$ | $B$    | $\Delta B$ | $C$    | $\Delta C$ | $\Sigma \Delta$ | $V_3$ | $\Delta V_3$ |
|-----------------------------------|--------|------------|--------|------------|--------|------------|-----------------|-------|--------------|
| $\omega B97X-D/6-311+G(d,p)$      | 5301.0 | -1.1       | 3115.7 | -1.6       | 1986.6 | -1.3       | 4.1             | 234.1 | 36.4         |
| $\omega B97X-D/6-311++G(d,p)$     | 5300.7 | -0.8       | 3115.6 | -1.5       | 1986.5 | -1.3       | 3.6             | 237.6 | 39.8         |
| $\omega B97X-D/6-311G(df,pd)$     | 5318.7 | -18.8      | 3126.7 | -12.6      | 1993.5 | -8.2       | 39.7            | 228.4 | 30.7         |
| $\omega B97X-D/6-311+G(df,pd)$    | 5319.7 | -19.9      | 3124.7 | -10.6      | 1992.8 | -7.6       | 38.1            | 229.4 | 31.6         |
| $\omega B97X-D/6-311++G(df,pd)$   | 5319.5 | -19.6      | 3124.7 | -10.6      | 1992.8 | -7.5       | 37.7            | 232.2 | 34.4         |
| $\omega B97X-D/6-311G(2d,2p)$     | 5329.6 | -29.8      | 3126.0 | -11.9      | 1994.7 | -9.4       | 51.1            | 200.1 | 2.3          |
| $\omega B97X-D/6-311+G(2d,2p)$    | 5329.5 | -29.7      | 3125.4 | -11.3      | 1994.4 | -9.1       | 50.1            | 207.7 | 10.0         |
| $\omega B97X-D/6-311++G(2d,2p)$   | 5329.2 | -29.4      | 3125.4 | -11.3      | 1994.4 | -9.1       | 49.8            | 208.2 | 10.4         |
| $\omega B97X-D/6-311G(2df,2pd)$   | 5349.4 | -49.6      | 3132.2 | -18.1      | 1999.9 | -14.7      | 82.3            | 188.5 | -9.2         |
| $\omega B97X-D/6-311+G(2df,2pd)$  | 5349.7 | -49.8      | 3131.3 | -17.2      | 1999.6 | -14.3      | 81.4            | 194.7 | -3.1         |
| $\omega B97X-D/6-311++G(2df,2pd)$ | 5349.4 | -49.5      | 3131.3 | -17.2      | 1999.6 | -14.3      | 81.0            | 196.5 | -1.3         |
| $\omega B97X-D/6-311G(3df,3pd)$   | 5363.4 | -63.6      | 3136.3 | -22.2      | 2003.6 | -18.3      | 104.1           | 180.5 | -17.3        |
| $\omega B97X-D/6-311+G(3df,3pd)$  | 5362.7 | -62.8      | 3135.9 | -21.8      | 2003.3 | -18.0      | 102.6           | 191.0 | -6.7         |
| $\omega B97X-D/6-311++G(3df,3pd)$ | 5362.5 | -62.7      | 3135.8 | -21.7      | 2003.3 | -18.0      | 102.4           | 191.5 | -6.3         |
| $\omega B97X-D/cc-pVDZ$           | 5262.0 | 37.9       | 3099.3 | 14.8       | 1974.7 | 10.5       | 63.2            | 225.8 | 28.1         |
| $\omega B97X-D/cc-pVTZ$           | 5342.2 | -42.3      | 3129.7 | -15.6      | 1997.9 | -12.6      | 70.6            | 201.7 | 4.0          |
| $\omega B97X-D/aug-cc-pVDZ$       | 5264.0 | 35.8       | 3098.7 | 15.4       | 1974.7 | 10.5       | 61.8            | 224.8 | 27.0         |
| $\omega B97X-D/aug-cc-pVTZ$       | 5343.4 | -43.6      | 3129.5 | -15.4      | 1998.0 | -12.7      | 71.7            | 202.9 | 5.2          |
| $B3LYP-D3/6-31G(d,p)$             | 5229.1 | 70.8       | 3087.0 | 27.1       | 1964.8 | 20.5       | 118.3           | 274.6 | 76.8         |
| $B3LYP-D3/6-31+G(d,p)$            | 5222.6 | 77.3       | 3083.5 | 30.6       | 1962.5 | 22.7       | 130.7           | 270.4 | 72.7         |
| $B3LYP-D3/6-31++G(d,p)$           | 5222.5 | 77.3       | 3083.5 | 30.6       | 1962.5 | 22.7       | 130.6           | 268.0 | 70.3         |
| $B3LYP-D3/6-311G(d,p)$            | 5242.6 | 57.2       | 3095.5 | 18.6       | 1970.1 | 15.1       | 91.0            | 250.2 | 52.5         |
| $B3LYP-D3/6-311+G(d,p)$           | 5243.2 | 56.7       | 3093.6 | 20.5       | 1969.5 | 15.8       | 92.9            | 251.4 | 53.7         |
| $B3LYP-D3/6-311++G(d,p)$          | 5242.9 | 57.0       | 3093.5 | 20.6       | 1969.4 | 15.9       | 93.4            | 255.7 | 57.9         |
| $B3LYP-D3/6-311G(df,pd)$          | 5261.1 | 38.8       | 3105.7 | 8.4        | 1976.8 | 8.5        | 55.7            | 248.0 | 50.3         |
| $B3LYP-D3/6-311+G(df,pd)$         | 5262.0 | 37.9       | 3103.8 | 10.3       | 1976.2 | 9.1        | 57.2            | 247.0 | 49.3         |
| $B3LYP-D3/6-311++G(df,pd)$        | 5261.7 | 38.1       | 3103.7 | 10.3       | 1976.1 | 9.2        | 57.6            | 250.8 | 53.1         |
| $B3LYP-D3/6-311G(2d,2p)$          | 5272.5 | 27.3       | 3104.9 | 9.2        | 1978.0 | 7.3        | 43.8            | 220.9 | 23.2         |
| $B3LYP-D3/6-311+G(2d,2p)$         | 5274.5 | 25.3       | 3103.8 | 10.3       | 1977.8 | 7.4        | 43.1            | 224.3 | 26.6         |
| $B3LYP-D3/6-311++G(2d,2p)$        | 5274.2 | 25.6       | 3103.8 | 10.3       | 1977.8 | 7.5        | 43.4            | 225.7 | 28.0         |
| $B3LYP-D3/6-311G(2df,2pd)$        | 5294.3 | 5.6        | 3110.9 | 3.2        | 1983.5 | 1.8        | 10.5            | 208.6 | 10.9         |
| $B3LYP-D3/6-311+G(2df,2pd)$       | 5294.5 | 5.4        | 3110.1 | 4.0        | 1983.2 | 2.1        | 11.4            | 211.6 | 13.9         |
| $B3LYP-D3/6-311++G(2df,2pd)$      | 5294.2 | 5.6        | 3110.1 | 4.0        | 1983.2 | 2.1        | 11.7            | 214.2 | 16.5         |
| $B3LYP-D3/6-311G(3df,3pd)$        | 5308.6 | -8.7       | 3114.9 | -0.8       | 1987.1 | -1.9       | 11.4            | 196.3 | -1.5         |
| $B3LYP-D3/6-311+G(3df,3pd)$       | 5307.9 | -8.1       | 3114.5 | -0.5       | 1986.9 | -1.6       | 10.2            | 207.3 | 9.6          |
| $B3LYP-D3/6-311++G(3df,3pd)$      | 5307.8 | -7.9       | 3114.5 | -0.4       | 1986.9 | -1.6       | 10.0            | 207.9 | 10.2         |
| $B3LYP-D3/cc-pVDZ$                | 5202.7 | 97.2       | 3079.0 | 35.1       | 1958.1 | 27.1       | 159.4           | 248.1 | 50.4         |
| $B3LYP-D3/cc-pVTZ$                | 5285.3 | 14.6       | 3108.6 | 5.5        | 1981.3 | 4.0        | 24.1            | 222.9 | 25.1         |
| $B3LYP-D3/aug-cc-pVDZ$            | 5203.9 | 96.0       | 3078.0 | 36.1       | 1957.8 | 27.4       | 159.5           | 249.5 | 51.7         |
| $B3LYP-D3/aug-cc-pVTZ$            | 5286.4 | 13.5       | 3108.2 | 5.9        | 1981.3 | 4.0        | 23.4            | 222.1 | 24.3         |
| $B3LYP-D3BJ/6-31G(d,p)$           | 5231.6 | 68.3       | 3091.7 | 22.4       | 1967.1 | 18.2       | 108.9           | 255.7 | 58.0         |
| $B3LYP-D3BJ/6-31+G(d,p)$          | 5225.2 | 74.6       | 3088.2 | 25.9       | 1964.8 | 20.4       | 120.9           | 252.0 | 54.3         |
| $B3LYP-D3BJ/6-31++G(d,p)$         | 5225.2 | 74.7       | 3088.3 | 25.8       | 1964.8 | 20.4       | 120.9           | 249.4 | 51.7         |
| $B3LYP-D3BJ/6-311G(d,p)$          | 5244.7 | 55.1       | 3100.2 | 13.9       | 1972.3 | 12.9       | 81.9            | 231.0 | 33.3         |
| $B3LYP-D3BJ/6-311+G(d,p)$         | 5245.3 | 54.5       | 3098.4 | 15.7       | 1971.7 | 13.6       | 83.8            | 232.2 | 34.4         |
| $B3LYP-D3BJ/6-311++G(d,p)$        | 5245.0 | 54.8       | 3098.3 | 15.8       | 1971.6 | 13.7       | 84.3            | 236.4 | 38.6         |
| $B3LYP-D3BJ/6-311G(df,pd)$        | 5262.6 | 37.2       | 3110.4 | 3.7        | 1978.9 | 6.3        | 47.3            | 228.6 | 30.9         |
| $B3LYP-D3BJ/6-311+G(df,pd)$       | 5263.5 | 36.3       | 3108.6 | 5.5        | 1978.3 | 6.9        | 48.8            | 195.4 | -2.4         |
| $B3LYP-D3BJ/6-311++G(df,pd)$      | 5263.3 | 36.6       | 3108.5 | 5.6        | 1978.2 | 7.0        | 49.2            |       |              |

|                              | $A$    | $\Delta A$ | $B$    | $\Delta B$ | $C$    | $\Delta C$ | $\Sigma \Delta$ | $V_3$ | $\Delta V_3$ |
|------------------------------|--------|------------|--------|------------|--------|------------|-----------------|-------|--------------|
| B3LYP-D3BJ/6-311G(2d,2p)     | 5276.0 | 23.9       | 3108.9 | 5.1        | 1980.1 | 5.2        | 34.2            | 200.4 | 2.7          |
| B3LYP-D3BJ/6-311+G(2d,2p)    | 5275.9 | 23.9       | 3108.5 | 5.6        | 1979.9 | 5.3        | 34.8            | 204.0 | 6.3          |
| B3LYP-D3BJ/6-311++G(2d,2p)   | 5275.7 | 24.2       | 3108.5 | 5.6        | 1979.9 | 5.4        | 35.1            | 205.3 | 7.6          |
| B3LYP-D3BJ/6-311G(2df,2pd)   | 5295.1 | 4.7        | 3115.5 | -1.4       | 1985.5 | -0.2       | 6.4             | 188.1 | -9.6         |
| B3LYP-D3BJ/6-311+G(2df,2pd)  | 5295.4 | 4.5        | 3114.7 | -0.6       | 1985.2 | 0.1        | 5.2             | 191.1 | -6.6         |
| B3LYP-D3BJ/6-311++G(2df,2pd) | 5295.1 | 4.7        | 3114.7 | -0.6       | 1985.2 | 0.1        | 5.5             | 193.7 | -4.1         |
| B3LYP-D3BJ/6-311G(3df,3pd)   | 5309.2 | -9.3       | 3119.4 | -5.3       | 1989.1 | -3.8       | 18.4            | 175.5 | -22.2        |
| B3LYP-D3BJ/6-311+G(3df,3pd)  | 5308.6 | -8.7       | 3119.1 | -5.0       | 1988.8 | -3.6       | 17.3            | 186.7 | -11.1        |
| B3LYP-D3BJ/6-311++G(3df,3pd) | 5308.5 | -8.6       | 3119.0 | -4.9       | 1988.8 | -3.5       | 17.1            | 187.3 | -10.5        |
| B3LYP-D3BJ/cc-pVDZ           | 5205.7 | 94.1       | 3083.8 | 30.3       | 1960.5 | 24.8       | 149.2           | 228.3 | 30.6         |
| B3LYP-D3BJ/cc-pVTZ           | 5286.3 | 13.5       | 3113.3 | 0.8        | 1983.3 | 1.9        | 16.3            | 202.4 | 4.6          |
| B3LYP-D3BJ/aug-cc-pVDZ       | 5206.9 | 92.9       | 3082.8 | 31.3       | 1960.2 | 25.1       | 149.3           | 230.2 | 32.5         |
| B3LYP-D3BJ/aug-cc-pVTZ       | 5287.4 | 12.4       | 3112.9 | 1.2        | 1983.3 | 1.9        | 15.6            | 201.5 | 3.8          |
| CAM-B3LYP-D3BJ/6-311G(d,p)   | 5303.5 | -3.7       | 3122.6 | -8.5       | 1989.7 | -4.4       | 16.6            | 229.4 | 31.6         |
| CAM-B3LYP-D3BJ/6-311+G(d,p)  | 5304.3 | -4.5       | 3120.7 | -6.6       | 1989.0 | -3.7       | 14.8            | 233.3 | 35.5         |
| CAM-B3LYP-D3BJ/6-311++G(d,p) | 5304.0 | -4.2       | 3120.6 | -6.5       | 1988.9 | -3.7       | 14.3            | 239.1 | 41.4         |
| CAM-B3LYP-D3BJ/cc-pVDZ       | 5263.1 | 36.8       | 3105.7 | 8.4        | 1977.4 | 7.8        | 53.0            | 231.7 | 34.0         |
| CAM-B3LYP-D3BJ/cc-pVTZ       | 5343.5 | -43.6      | 3135.6 | -21.6      | 2000.4 | -15.2      | 80.4            | 205.9 | 8.2          |
| CAM-B3LYP-D3BJ/aug-cc-pVDZ   | 5264.7 | 35.2       | 3104.8 | 9.3        | 1977.3 | 8.0        | 52.5            | 233.9 | 36.2         |
| B3PW91-D3/6-31G(d,p)         | 5268.4 | 31.5       | 3105.6 | 8.5        | 1977.9 | 7.4        | 47.4            | 251.4 | 53.7         |
| B3PW91-D3/6-31+G(d,p)        | 5262.5 | 37.4       | 3103.4 | 10.7       | 1976.2 | 9.0        | 57.1            | 248.6 | 50.9         |
| B3PW91-D3/6-31++G(d,p)       | 5262.4 | 37.4       | 3103.4 | 10.7       | 1976.2 | 9.0        | 57.1            | 248.9 | 51.2         |
| B3PW91-D3/6-311G(d,p)        | 5282.8 | 17.1       | 3115.4 | -1.3       | 1984.0 | 1.4        | 19.7            | 230.7 | 33.0         |
| B3PW91-D3/6-311+G(d,p)       | 5282.8 | 17.0       | 3113.4 | 0.7        | 1983.1 | 2.2        | 20.0            | 233.1 | 35.3         |
| B3PW91-D3/6-311++G(d,p)      | 5282.5 | 17.4       | 3113.3 | 0.8        | 1983.0 | 2.3        | 20.5            | 237.4 | 39.6         |
| B3PW91-D3/6-311G(df,pd)      | 5299.9 | -0.1       | 3124.3 | -10.2      | 1989.9 | -4.6       | 14.9            | 228.9 | 31.2         |
| B3PW91-D3/6-311+G(df,pd)     | 5300.4 | -0.5       | 3122.3 | -8.2       | 1989.1 | -3.8       | 12.5            | 228.8 | 31.0         |
| B3PW91-D3/6-311++G(df,pd)    | 5300.1 | -0.2       | 3122.2 | -8.1       | 1989.0 | -3.8       | 12.1            | 232.5 | 34.8         |
| B3PW91-D3/6-311G(2d,2p)      | 5313.2 | -13.3      | 3123.4 | -9.3       | 1991.3 | -6.0       | 28.6            | 198.4 | 0.7          |
| B3PW91-D3/6-311+G(2d,2p)     | 5312.6 | -12.8      | 3122.8 | -8.7       | 1991.0 | -5.7       | 27.2            | 203.3 | 5.6          |
| B3PW91-D3/6-311++G(2d,2p)    | 5312.3 | -12.4      | 3122.9 | -8.8       | 1990.9 | -5.7       | 26.9            | 204.4 | 6.7          |
| B3PW91-D3/6-311G(2df,2pd)    | 5331.3 | -31.4      | 3129.2 | -15.2      | 1996.2 | -10.9      | 57.5            | 186.2 | -11.5        |
| B3PW91-D3/6-311+G(2df,2pd)   | 5331.0 | -31.2      | 3128.4 | -14.3      | 1995.8 | -10.5      | 56.0            | 190.4 | -7.4         |
| B3PW91-D3/6-311++G(2df,2pd)  | 5330.8 | -30.9      | 3128.4 | -14.3      | 1995.8 | -10.5      | 55.7            | 192.8 | -4.9         |
| B3PW91-D3/6-311G(3df,3pd)    | 5344.5 | -44.7      | 3133.1 | -19.0      | 1999.6 | -14.4      | 78.1            | 178.8 | -18.9        |
| B3PW91-D3/6-311+G(3df,3pd)   | 5343.8 | -43.9      | 3132.8 | -18.7      | 1999.4 | -14.2      | 76.8            | 188.8 | -8.9         |
| B3PW91-D3/6-311++G(3df,3pd)  | 5343.6 | -43.8      | 3132.8 | -18.7      | 1999.4 | -14.1      | 76.5            | 189.4 | -8.3         |
| B3PW91-D3/cc-pVDZ            | 5245.4 | 54.5       | 3098.2 | 15.9       | 1971.9 | 13.3       | 83.6            | 225.1 | 27.3         |
| B3PW91-D3/cc-pVTZ            | 5321.5 | -21.6      | 3126.3 | -12.2      | 1993.6 | -8.4       | 42.2            | 201.6 | 3.9          |
| B3PW91-D3/aug-cc-pVDZ        | 5246.1 | 53.7       | 3097.5 | 16.6       | 1971.7 | 13.6       | 83.9            | 224.0 | 26.3         |
| B3PW91-D3/aug-cc-pVTZ        | 5322.4 | -22.6      | 3126.0 | -11.9      | 1993.7 | -8.4       | 42.9            |       |              |
| B3PW91-D3BJ/6-31G(d,p)       | 5269.2 | 30.6       | 3109.9 | 4.2        | 1979.7 | 5.5        | 40.4            | 235.3 | 37.5         |
| B3PW91-D3BJ/6-31+G(d,p)      | 5263.6 | 36.3       | 3107.7 | 6.4        | 1978.1 | 7.2        | 49.8            | 232.8 | 35.1         |
| B3PW91-D3BJ/6-31++G(d,p)     | 5263.5 | 36.4       | 3107.8 | 6.3        | 1978.1 | 7.1        | 49.8            | 233.0 | 35.2         |
| B3PW91-D3BJ/6-311G(d,p)      | 5283.1 | 16.7       | 3119.7 | -5.6       | 1985.7 | -0.4       | 22.8            | 213.9 | 16.2         |
| B3PW91-D3BJ/6-311+G(d,p)     | 5283.2 | 16.6       | 3117.7 | -3.6       | 1984.9 | 0.4        | 20.6            | 216.3 | 18.5         |
| B3PW91-D3BJ/6-311++G(d,p)    | 5282.9 | 16.9       | 3117.6 | -3.5       | 1984.8 | 0.5        | 20.9            | 220.5 | 22.8         |
| B3PW91-D3BJ/6-311G(df,pd)    | 5299.8 | 0.0        | 3128.6 | -14.5      | 1991.6 | -6.3       | 20.8            | 212.1 | 14.3         |
| B3PW91-D3BJ/6-311+G(df,pd)   | 5300.3 | -0.4       | 3126.6 | -12.5      | 1990.8 | -5.6       | 18.4            | 211.9 | 14.2         |

|                               | <i>A</i> | $\Delta A$ | <i>B</i> | $\Delta B$ | <i>C</i> | $\Delta C$ | $\Sigma \Delta$ | $V_3$ | $\Delta V_3$ |
|-------------------------------|----------|------------|----------|------------|----------|------------|-----------------|-------|--------------|
| B3PW91-D3BJ/6-311++G(df,pd)   | 5300.0   | -0.1       | 3126.5   | -12.4      | 1990.7   | -5.5       | 18.0            | 215.6 | 17.8         |
| B3PW91-D3BJ/6-311G(2d,2p)     | 5312.9   | -13.1      | 3127.6   | -13.5      | 1992.9   | -7.7       | 34.3            | 180.3 | -17.4        |
| B3PW91-D3BJ/6-311+G(2d,2p)    | 5312.4   | -12.6      | 3127.1   | -13.0      | 1992.7   | -7.4       | 32.9            | 185.2 | -12.5        |
| B3PW91-D3BJ/6-311++G(2d,2p)   | 5312.1   | -12.2      | 3127.1   | -13.0      | 1992.6   | -7.4       | 32.6            | 186.3 | -11.4        |
| B3PW91-D3BJ/6-311G(2df,2pd)   | 5330.6   | -30.8      | 3133.4   | -19.3      | 1997.8   | -12.5      | 62.7            | 168.1 | -29.7        |
| B3PW91-D3BJ/6-311+G(2df,2pd)  | 5330.5   | -30.6      | 3132.6   | -18.5      | 1997.4   | -12.2      | 61.2            | 172.2 | -25.5        |
| B3PW91-D3BJ/6-311++G(2df,2pd) | 5330.2   | -30.3      | 3132.6   | -18.5      | 1997.4   | -12.1      | 60.9            | 174.6 | -23.1        |
| B3PW91-D3BJ/6-311G(3df,3pd)   | 5343.6   | -43.8      | 3137.3   | -23.2      | 2001.2   | -15.9      | 82.9            | 160.6 | -37.1        |
| B3PW91-D3BJ/6-311+G(3df,3pd)  | 5343.0   | -43.1      | 3137.0   | -22.9      | 2001.0   | -15.7      | 81.7            | 170.7 | -27.0        |
| B3PW91-D3BJ/6-311++G(3df,3pd) | 5342.8   | -42.9      | 3136.9   | -22.8      | 2001.0   | -15.7      | 81.5            | 171.3 | -26.4        |
| B3PW91-D3BJ/cc-pVDZ           | 5246.7   | 53.2       | 3102.6   | 11.5       | 1973.9   | 11.4       | 76.0            | 207.5 | 9.7          |
| B3PW91-D3BJ/cc-pVTZ           | 5321.0   | -21.2      | 3130.5   | -16.5      | 1995.3   | -10.0      | 47.7            | 183.4 | -14.4        |
| B3PW91-D3BJ/aug-cc-pVDZ       | 5247.4   | 52.4       | 3101.9   | 12.2       | 1973.6   | 11.6       | 76.3            | 206.7 | 8.9          |
| B3PW91-D3BJ/aug-cc-pVTZ       | 5322.0   | -22.1      | 3130.3   | -16.2      | 1995.3   | -10.0      | 48.4            | 182.8 | -15.0        |
| MN15/6-31G(d,p)               | 5308.8   | -8.9       | 3113.0   | 1.1        | 1986.6   | -1.3       | 11.4            |       |              |
| MN15/6-31+G(d,p)              | 5303.4   | -3.6       | 3109.6   | 4.5        | 1984.5   | 0.8        | 8.8             | 253.1 | 55.4         |
| MN15/6-31++G(d,p)             | 5303.4   | -3.6       | 3109.6   | 4.5        | 1984.5   | 0.8        | 8.8             | 247.6 | 49.9         |
| MN15/6-311G(d,p)              | 5323.5   | -23.6      | 3124.8   | -10.7      | 1993.4   | -8.1       | 42.5            | 228.8 | 31.0         |
| MN15/6-311+G(d,p)             | 5325.0   | -25.1      | 3122.7   | -8.6       | 1992.8   | -7.5       | 41.3            | 229.6 | 31.9         |
| MN15/6-311++G(d,p)            | 5324.8   | -24.9      | 3122.6   | -8.5       | 1992.7   | -7.4       | 40.9            | 234.4 | 36.7         |
| MN15/6-311G(df,pd)            | 5344.3   | -44.5      | 3135.1   | -21.0      | 2000.4   | -15.2      | 80.6            | 228.1 | 30.4         |
| MN15/6-311+G(df,pd)           | 5345.7   | -45.8      | 3132.5   | -18.4      | 1999.6   | -14.3      | 78.5            | 226.7 | 29.0         |
| MN15/6-311++G(df,pd)          | 5345.7   | -45.8      | 3132.5   | -18.4      | 1999.6   | -14.3      | 78.5            | 229.5 | 31.8         |
| MN15/6-311G(2d,2p)            | 5356.0   | -56.1      | 3132.9   | -18.8      | 2001.1   | -15.8      | 90.7            | 189.3 | -8.4         |
| MN15/6-311+G(2d,2p)           | 5356.0   | -56.2      | 3132.1   | -18.0      | 2000.8   | -15.5      | 89.7            | 197.3 | -0.4         |
| MN15/6-311++G(2d,2p)          | 5355.8   | -55.9      | 3132.1   | -18.0      | 2000.8   | -15.5      | 89.5            | 198.0 | 0.3          |
| MN15/6-311G(2df,2pd)          | 5376.1   | -76.3      | 3138.7   | -24.6      | 2006.3   | -21.0      | 121.9           | 178.4 | -19.3        |
| MN15/6-311+G(2df,2pd)         | 5376.6   | -76.7      | 3137.6   | -23.6      | 2005.9   | -20.6      | 120.9           | 187.6 | -10.1        |
| MN15/6-311++G(2df,2pd)        | 5376.3   | -76.5      | 3137.7   | -23.6      | 2005.9   | -20.6      | 120.7           | 189.5 | -8.2         |
| MN15/6-311G(3df,3pd)          | 5387.8   | -88.0      | 3142.9   | -28.8      | 2009.6   | -24.4      | 141.2           | 176.8 | -20.9        |
| MN15/6-311+G(3df,3pd)         | 5386.9   | -87.0      | 3142.2   | -28.1      | 2009.2   | -23.9      | 139.0           | 186.2 | -11.5        |
| MN15/6-311++G(3df,3pd)        | 5386.8   | -86.9      | 3142.2   | -28.1      | 2009.2   | -23.9      | 138.9           | 185.4 | -12.4        |
| MN15/cc-pVDZ                  | 5289.2   | 10.6       | 3107.4   | 6.7        | 1981.8   | 3.5        | 20.9            | 218.8 | 21.0         |
| MN15/cc-pVTZ                  | 5371.2   | -71.4      | 3138.2   | -24.1      | 2005.4   | -20.1      | 115.6           | 196.1 | -1.7         |
| MN15/aug-cc-pVDZ              | 5291.5   | 8.4        | 3107.4   | 6.7        | 1982.1   | 3.2        | 18.3            |       |              |
| MN15/aug-cc-pVTZ              | 5379.1   | -79.3      | 3140.3   | -26.2      | 2007.3   | -22.1      | 127.5           | 214.6 | 16.8         |
| PBE0/6-31G(d,p)               | 5200.3   | 99.6       | 3072.1   | 42.0       | 1955.0   | 30.3       | 171.8           | 223.1 | 25.4         |
| PBE0/6-31+G(d,p)              | 5193.2   | 106.7      | 3068.8   | 45.3       | 1952.7   | 32.5       | 184.5           | 219.0 | 21.3         |
| PBE0/6-31++G(d,p)             | 5193.1   | 106.7      | 3068.9   | 45.2       | 1952.7   | 32.5       | 184.5           | 217.9 | 20.2         |
| PBE0/6-311G(d,p)              | 5214.3   | 85.6       | 3081.6   | 32.5       | 1960.8   | 24.4       | 142.5           | 198.7 | 0.9          |
| PBE0/6-311+G(d,p)             | 5214.6   | 85.3       | 3079.7   | 34.4       | 1960.1   | 25.2       | 144.8           | 198.3 | 0.6          |
| PBE0/6-311++G(d,p)            | 5214.3   | 85.6       | 3079.6   | 34.5       | 1960.0   | 25.3       | 145.3           | 202.4 | 4.7          |
| PBE0/6-311G(df,pd)            | 5232.3   | 67.6       | 3090.7   | 23.4       | 1967.0   | 18.3       | 109.2           | 196.9 | -0.8         |
| PBE0/6-311+G(df,pd)           | 5232.4   | 67.4       | 3088.6   | 25.5       | 1966.2   | 19.1       | 112.0           | 194.3 | -3.4         |
| PBE0/6-311++G(df,pd)          | 5232.4   | 67.4       | 3088.6   | 25.5       | 1966.2   | 19.1       | 112.0           | 197.8 | 0.1          |
| PBE0/6-311G(2d,2p)            | 5243.8   | 56.1       | 3088.8   | 25.3       | 1967.8   | 17.5       | 98.9            | 164.7 | -33.0        |
| PBE0/6-311+G(2d,2p)           | 5244.1   | 55.8       | 3087.9   | 26.2       | 1967.4   | 17.8       | 99.8            | 166.5 | -31.3        |
| PBE0/6-311++G(2d,2p)          | 5243.7   | 56.1       | 3087.9   | 26.2       | 1967.4   | 17.9       | 100.2           | 168.1 | -29.7        |
| PBE0/6-311G(2df,2pd)          | 5263.3   | 36.6       | 3094.7   | 19.4       | 1972.9   | 12.4       | 68.4            | 153.8 | -43.9        |

|                           | <i>A</i> | $\Delta A$ | <i>B</i> | $\Delta B$ | <i>C</i> | $\Delta C$ | $\Sigma \Delta$ | $V_3$ | $\Delta V_3$ |
|---------------------------|----------|------------|----------|------------|----------|------------|-----------------|-------|--------------|
| PBE0/6-311+G(2df,2pd)     | 5263.3   | 36.6       | 3093.8   | 20.3       | 1972.5   | 12.7       | 69.6            | 155.3 | −42.4        |
| PBE0/6-311++G(2df,2pd)    | 5263.0   | 36.9       | 3093.8   | 20.3       | 1972.5   | 12.8       | 69.9            | 157.9 | −39.8        |
| PBE0/6-311G(3df,3pd)      | 5278.1   | 21.7       | 3099.0   | 15.1       | 1976.7   | 8.5        | 45.3            | 144.3 | −53.4        |
| PBE0/6-311+G(3df,3pd)     | 5277.5   | 22.3       | 3098.7   | 15.4       | 1976.5   | 8.7        | 46.5            | 153.9 | −43.9        |
| PBE0/6-311++G(3df,3pd)    | 5277.4   | 22.5       | 3098.6   | 15.5       | 1976.5   | 8.8        | 46.8            | 154.5 | −43.2        |
| PBE0/cc-pVDZ              | 5178.7   | 121.2      | 3066.4   | 47.7       | 1949.9   | 35.4       | 204.2           | 189.8 | −7.9         |
| PBE0/cc-pVTZ              | 5254.0   | 45.8       | 3092.6   | 21.5       | 1970.7   | 14.5       | 81.9            | 167.3 | −30.5        |
| PBE0/aug-cc-pVDZ          | 5178.5   | 121.3      | 3065.0   | 49.1       | 1949.2   | 36.0       | 206.5           | 191.6 | −6.1         |
| PBE0/aug-cc-pVTZ          | 5254.9   | 45.0       | 3092.0   | 22.1       | 1970.6   | 14.6       | 81.7            | 167.2 | −30.5        |
| PBE0-D3/6-31G(d,p)        | 5197.4   | 102.5      | 3072.7   | 41.4       | 1954.8   | 30.4       | 174.3           | 227.0 | 29.2         |
| PBE0-D3/6-31+G(d,p)       | 5190.3   | 109.5      | 3069.3   | 44.7       | 1952.6   | 32.7       | 187.0           | 222.6 | 24.9         |
| PBE0-D3/6-31++G(d,p)      | 5190.3   | 109.6      | 3069.4   | 44.7       | 1952.6   | 32.7       | 187.0           | 221.5 | 23.8         |
| PBE0-D3/6-311G(d,p)       | 5211.4   | 88.5       | 3082.2   | 31.9       | 1960.6   | 24.6       | 145.1           | 202.7 | 5.0          |
| PBE0-D3/6-311+G(d,p)      | 5211.7   | 88.2       | 3080.3   | 33.8       | 1959.9   | 25.3       | 147.3           | 202.3 | 4.6          |
| PBE0-D3/6-311++G(d,p)     | 5211.4   | 88.5       | 3080.2   | 33.9       | 1959.8   | 25.4       | 147.9           | 206.5 | 8.7          |
| PBE0-D3/6-311G(df,pd)     | 5229.4   | 70.5       | 3091.2   | 22.9       | 1966.8   | 18.5       | 111.8           | 201.1 | 3.3          |
| PBE0-D3/6-311+G(df,pd)    | 5229.5   | 70.4       | 3089.2   | 24.9       | 1966.0   | 19.3       | 114.6           | 198.5 | 0.8          |
| PBE0-D3/6-311G(2d,2p)     | 5240.9   | 59.0       | 3089.3   | 24.8       | 1967.6   | 17.7       | 101.5           | 169.2 | −28.6        |
| PBE0-D3/6-311+G(2d,2p)    | 5241.2   | 58.7       | 3088.4   | 25.7       | 1967.2   | 18.0       | 102.4           | 171.0 | −26.8        |
| PBE0-D3/6-311++G(2d,2p)   | 5240.8   | 59.0       | 3088.4   | 25.7       | 1967.2   | 18.1       | 102.8           | 172.6 | −25.2        |
| PBE0-D3/6-311G(2df,2pd)   | 5260.3   | 39.5       | 3095.2   | 18.9       | 1972.7   | 12.6       | 71.0            | 158.3 | −39.4        |
| PBE0-D3/6-311+G(2df,2pd)  | 5260.3   | 39.5       | 3094.3   | 19.8       | 1972.3   | 12.9       | 72.2            | 169.9 | −37.8        |
| PBE0-D3/6-311++G(2df,2pd) | 5260.0   | 39.8       | 3094.3   | 19.8       | 1972.3   | 13.0       | 72.6            | 162.5 | −35.3        |
| PBE0-D3/6-311G(3df,3pd)   | 5275.2   | 24.7       | 3099.5   | 14.6       | 1976.5   | 8.7        | 48.0            | 149.0 | −48.8        |
| PBE0-D3/6-311+G(3df,3pd)  | 5274.6   | 25.3       | 3099.2   | 14.9       | 1976.3   | 8.9        | 49.2            | 158.5 | −39.2        |
| PBE0-D3/6-311++G(3df,3pd) | 5274.4   | 25.5       | 3099.1   | 15.0       | 1976.3   | 9.0        | 49.4            | 159.1 | −38.6        |
| PBE0-D3/cc-pVDZ           | 5175.8   | 124.0      | 3067.0   | 47.1       | 1949.7   | 35.5       | 206.7           | 194.0 | −3.8         |
| PBE0-D3/cc-pVTZ           | 5251.1   | 48.8       | 3093.1   | 21.0       | 1970.5   | 14.7       | 84.5            | 171.9 | −25.8        |
| PBE0-D3/aug-cc-pVDZ       | 5175.7   | 124.2      | 3065.5   | 48.6       | 1949.1   | 36.2       | 209.0           | 195.7 | −2.0         |
| PBE0-D3/aug-cc-pVTZ       | 5291.9   | 47.9       | 3092.5   | 21.6       | 1970.4   | 14.8       | 84.3            | 172.0 | −25.8        |
| Experimental              | 5299.9   |            | 3114.1   |            | 1985.3   |            |                 | 197.7 |              |

**Table S3:** Coefficients of the Fourier expansion for the potential energy curves of the methyl internal rotation of 2MTP given in Figure 2. The potential is expanded as

$$V(\alpha) = a_0 + a_3 \cos(3\alpha) + a_6 \cos(6\alpha) + a_9 \cos(9\alpha).$$

| Coef. | MP2            | B3LYP          |
|-------|----------------|----------------|
| $a_0$ | −591.244957593 | −592.422045454 |
| $a_3$ | −0.000402718   | −0.000534224   |
| $a_6$ | 0.000108369    | 0.000042608    |
| $a_9$ | −0.000011819   | −0.000003690   |

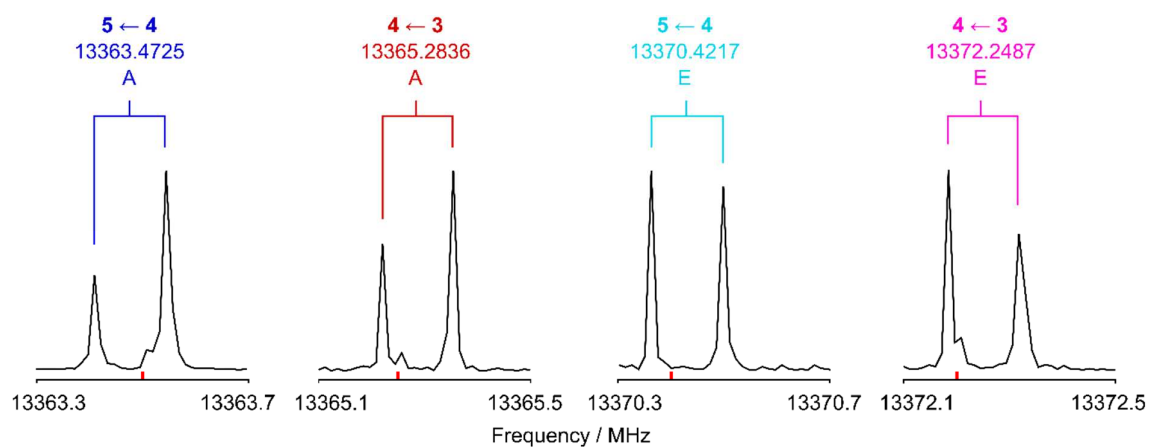

**Figure S1:** Four spectra of the  $b$ -type R-branch  $3_{13} \leftarrow 2_{02}$  transition of the  $^{33}\text{S}$  isotopologue of 2MTP, featuring the A- and E-species from methyl internal rotation and some components of the quadrupole hyperfine structure. The polarization frequencies are marked with red lines. Intensities are given in arbitrary units and are normalized for all spectra.



**Table S4.** Rotational constants of 2MTP for all observed isotopologues obtained with the *XIAM* program when  $D_{p_i^2 J}$ ,  $D_{p_i^2 K}$ , and  $D_{p_i^2 -}$  are fitted. For all  $^{13}\text{C}$  isotopologue fits, the values of  $D_K$  and  $d_2$  were fixed to those of the parent species.

| Par <sup>a</sup> | Unit | Parent         | <sup>34</sup> S | <sup>13</sup> C(2) | <sup>13</sup> C(3) | <sup>13</sup> C(4) | <sup>13</sup> C(5) | <sup>13</sup> C(9) |
|------------------|------|----------------|-----------------|--------------------|--------------------|--------------------|--------------------|--------------------|
| $A_0$            | MHz  | 5299.85002(45) | 5161.33031(63)  | 5296.4757(13)      | 5194.5222(15)      | 5232.1892(13)      | 5297.7182(11)      | 5298.8303(36)      |
| $B_0$            | MHz  | 3114.09632(30) | 3112.72380(44)  | 3101.70154(90)     | 3114.13351(92)     | 3078.91353(80)     | 3064.14099(72)     | 3015.8671(23)      |
| $C_0$            | MHz  | 1985.26582(21) | 1964.94486(32)  | 1979.75498(21)     | 1970.31204(18)     | 1961.46901(20)     | 1964.55462(19)     | 1944.73199(30)     |
| $N^b$            |      | 148            | 127             | 51                 | 47                 | 55                 | 54                 | 42                 |
| $\sigma^c$       | kHz  | 4.4            | 5.6             | 2.8                | 2.4                | 2.9                | 2.6                | 3.6                |

<sup>a</sup> All parameters refer to the principal axis system. Watson's S reduction in I' representation was used. Standard error in parentheses is in the units of the last significant digits.

<sup>b</sup> Number of lines.

<sup>c</sup> Standard deviation of the fit.

**Table S5.** A section of Table 2 showing the rotational constants of 2MTP for all observed isotopologues obtained with the *XIAM* program when  $D_{p_i^2 J}$ ,  $D_{p_i^2 K}$ , and  $D_{p_i^2 -}$  are fitted for the parent species and the  $^{34}\text{S}$  isotopologue fits. For all  $^{13}\text{C}$  isotopologue fits, the values of  $D_K$ ,  $d_2$ , and  $D_{p_i^2 -}$  were fixed to those of the parent species.

| Par <sup>a</sup> | Unit | Parent         | <sup>34</sup> S | <sup>13</sup> C(2) | <sup>13</sup> C(3) | <sup>13</sup> C(4) | <sup>13</sup> C(5) | <sup>13</sup> C(9) |
|------------------|------|----------------|-----------------|--------------------|--------------------|--------------------|--------------------|--------------------|
| $A_0$            | MHz  | 5299.85002(45) | 5161.33031(63)  | 5296.47565(86)     | 5194.52016(96)     | 5232.18924(71)     | 5297.71936(65)     | 5298.8233(15)      |
| $B_0$            | MHz  | 3114.09632(30) | 3112.72380(44)  | 3101.70161(38)     | 3114.13512(38)     | 3078.91352(30)     | 3064.14021(29)     | 3015.87188(63)     |
| $C_0$            | MHz  | 1985.26582(21) | 1964.94486(32)  | 1979.75497(20)     | 1970.31198(19)     | 1961.46901(20)     | 1964.55468(18)     | 1944.73180(31)     |
| $N^b$            |      | 148            | 127             | 51                 | 47                 | 55                 | 54                 | 42                 |
| $\sigma^c$       | kHz  | 4.4            | 5.6             | 2.8                | 2.5                | 2.9                | 2.6                | 3.8                |

<sup>a</sup> All parameters refer to the principal axis system. Watson's S reduction in I' representation was used. Standard error in parentheses is in the units of the last significant digits.

<sup>b</sup> Number of lines.

<sup>c</sup> Standard deviation of the fit.

**Table S6.** Rotational constants of 2MTP for all observed isotopologues obtained with the *XIAM* program when only  $D_{p_i^2 J}$  and  $D_{p_i^2 K}$  are fitted. For all  $^{13}\text{C}$  isotopologue fits, the values of  $D_K$  and  $d_2$  were fixed to those of the parent species.

| Par <sup>a</sup> | Unit | Parent         | <sup>34</sup> S | <sup>13</sup> C(2) | <sup>13</sup> C(3) | <sup>13</sup> C(4) | <sup>13</sup> C(5) | <sup>13</sup> C(9) |
|------------------|------|----------------|-----------------|--------------------|--------------------|--------------------|--------------------|--------------------|
| $A_0$            | MHz  | 5299.84640(74) | 5161.32794(71)  | 5296.47261(98)     | 5194.5169(12)      | 5232.18578(80)     | 5297.71590(70)     | 5298.8205(20)      |
| $B_0$            | MHz  | 3114.09953(42) | 3112.72640(43)  | 3101.70431(43)     | 3114.13765(48)     | 3078.91594(33)     | 3064.14274(31)     | 3015.87348(79)     |
| $C_0$            | MHz  | 1985.26548(38) | 1964.94443(40)  | 1979.75479(23)     | 1970.31188(23)     | 1961.46889(21)     | 1964.55452(19)     | 1944.73171(40)     |
| $N^b$            |      | 148            | 127             | 51                 | 47                 | 55                 | 54                 | 42                 |
| $\sigma^c$       | kHz  | 7.9            | 6.9             | 3.1                | 3.0                | 3.2                | 2.7                | 4.8                |

<sup>a</sup> All parameters refer to the principal axis system. Watson's S reduction in I' representation was used. Standard error in parentheses is in the units of the last significant digits.

<sup>b</sup> Number of lines.

<sup>c</sup> Standard deviation of the fit.

**Table S7:** Observed frequencies ( $\nu_{obs}$ ) of the parent species of 2MTP.  $J$ ,  $K_a$  and  $K_c$  are the quantum numbers for an asymmetric top.  $Sym$  is for the respective A or E torsional species. Observed-minus-calculated ( $\nu_o - \nu_c$ ) values (in kHz) as obtained after a fit with the program *XIAM*.

| $J'$ | $K_a'$ | $K_c'$ | $J$ | $K_a$ | $K_c$ | $Sym$ | $\nu_{obs}$ / GHz | $\nu_o - \nu_c$ |
|------|--------|--------|-----|-------|-------|-------|-------------------|-----------------|
| 2    | 0      | 2      | 1   | 0     | 1     | A     | 9.8627525         | -0.4            |
| 2    | 0      | 2      | 1   | 0     | 1     | E     | 9.8604369         | 1.2             |
| 3    | 0      | 3      | 2   | 0     | 2     | A     | 14.1126908        | 0.2             |
| 3    | 0      | 3      | 2   | 0     | 2     | E     | 14.1066432        | 0.9             |
| 4    | 0      | 4      | 3   | 0     | 3     | A     | 18.0301213        | -0.9            |
| 4    | 0      | 4      | 3   | 0     | 3     | E     | 18.0227677        | 0.0             |
| 5    | 0      | 5      | 4   | 0     | 4     | A     | 21.8966401        | -0.6            |
| 5    | 0      | 5      | 4   | 0     | 4     | E     | 21.8902762        | 0.3             |
| 6    | 0      | 6      | 5   | 0     | 5     | A     | 25.8065567        | 0.0             |
| 6    | 0      | 6      | 5   | 0     | 5     | E     | 25.8013001        | -0.1            |
| 1    | 1      | 1      | 0   | 0     | 0     | A     | 7.2947448         | 1.7             |
| 1    | 1      | 1      | 0   | 0     | 0     | E     | 7.2302205         | 0.3             |
| 2    | 1      | 2      | 1   | 0     | 1     | A     | 11.2654171        | 1.4             |
| 2    | 1      | 2      | 1   | 0     | 1     | E     | 11.2336638        | 0.2             |
| 3    | 1      | 3      | 2   | 0     | 2     | A     | 14.8214765        | 0.2             |
| 3    | 1      | 3      | 2   | 0     | 2     | E     | 14.7993557        | 1.7             |
| 4    | 1      | 4      | 3   | 0     | 3     | A     | 18.3292738        | 0.3             |
| 4    | 1      | 4      | 3   | 0     | 3     | E     | 18.3140482        | 1.1             |
| 5    | 1      | 5      | 4   | 0     | 4     | A     | 22.0093474        | -0.8            |
| 5    | 1      | 5      | 4   | 0     | 4     | E     | 21.9995821        | 1.4             |
| 6    | 1      | 6      | 5   | 0     | 5     | A     | 25.8461342        | -0.7            |
| 6    | 1      | 6      | 5   | 0     | 5     | E     | 25.8395306        | -0.3            |
| 1    | 1      | 0      | 1   | 0     | 1     | A     | 3.3240657         | 2.3             |
| 1    | 1      | 0      | 1   | 0     | 1     | E     | 3.3597833         | -1.0            |
| 2    | 1      | 1      | 2   | 0     | 2     | A     | 4.7887479         | 2.2             |
| 2    | 1      | 1      | 2   | 0     | 2     | E     | 4.7939375         | -1.0            |
| 3    | 1      | 2      | 3   | 0     | 3     | A     | 7.4150065         | -0.4            |
| 3    | 1      | 2      | 3   | 0     | 3     | E     | 7.4161364         | -0.9            |
| 4    | 1      | 3      | 4   | 0     | 4     | A     | 11.1502758        | 1.1             |
| 4    | 1      | 3      | 4   | 0     | 4     | E     | 11.1492974        | -1.6            |
| 5    | 1      | 4      | 5   | 0     | 5     | A     | 15.4905892        | 2.2             |
| 5    | 1      | 4      | 5   | 0     | 5     | E     | 15.4808332        | -1.6            |
| 6    | 1      | 5      | 6   | 0     | 6     | A     | 19.8865604        | 3.1             |
| 6    | 1      | 5      | 6   | 0     | 6     | E     | 19.8621726        | -4.0            |
| 7    | 1      | 6      | 7   | 0     | 7     | A     | 24.1027713        | 3.9             |
| 7    | 1      | 6      | 7   | 0     | 7     | E     | 24.0634546        | -6.3            |
| 2    | 0      | 2      | 1   | 1     | 1     | A     | 7.6673807         | -4.2            |
| 2    | 0      | 2      | 1   | 1     | 1     | E     | 7.7295349         | -0.4            |
| 3    | 0      | 3      | 2   | 1     | 2     | A     | 12.7100285        | 0.7             |
| 3    | 0      | 3      | 2   | 1     | 2     | E     | 12.7334150        | 0.6             |
| 4    | 0      | 4      | 3   | 1     | 3     | A     | 17.3213371        | 0.6             |
| 4    | 0      | 4      | 3   | 1     | 3     | E     | 17.3300565        | 0.5             |
| 5    | 0      | 5      | 4   | 1     | 4     | A     | 21.5974908        | 1.3             |

| $J'$ | $K_a'$ | $K_c'$ | $J$ | $K_a$ | $K_c$ | $Sym$ | $\nu_{obs}/\text{GHz}$ | $\nu_o - \nu_c$ |
|------|--------|--------|-----|-------|-------|-------|------------------------|-----------------|
| 5    | 0      | 5      | 4   | 1     | 4     | E     | 21.5989968             | 0.4             |
| 2    | 1      | 1      | 2   | 1     | 2     | A     | 3.3860849              | 2.0             |
| 2    | 1      | 1      | 2   | 1     | 2     | E     | 3.4207088              | -1.7            |
| 2    | 1      | 1      | 1   | 1     | 0     | A     | 11.3274298             | -5.3            |
| 3    | 1      | 2      | 2   | 1     | 1     | A     | 16.7389523             | 0.5             |
| 2    | 1      | 2      | 1   | 1     | 1     | A     | 9.0700418              | -5.9            |
| 2    | 1      | 2      | 1   | 1     | 1     | E     | 9.1027639              | 0.7             |
| 3    | 1      | 3      | 2   | 1     | 2     | A     | 13.4188141             | 0.6             |
| 3    | 1      | 3      | 2   | 1     | 2     | E     | 13.4261268             | 0.8             |
| 4    | 1      | 4      | 3   | 1     | 3     | A     | 17.6204876             | -0.1            |
| 4    | 1      | 4      | 3   | 1     | 3     | E     | 17.6213367             | 1.3             |
| 5    | 1      | 5      | 4   | 1     | 4     | A     | 21.7101971             | 0.1             |
| 5    | 1      | 5      | 4   | 1     | 4     | E     | 21.7083018             | 0.5             |
| 2    | 2      | 1      | 1   | 1     | 0     | A     | 17.9134875             | 7.3             |
| 2    | 2      | 1      | 1   | 1     | 0     | E     | 17.4826894             | -0.4            |
| 2    | 2      | 1      | 2   | 1     | 2     | A     | 9.9721357              | 7.7             |
| 2    | 2      | 1      | 2   | 1     | 2     | E     | 9.6088075              | -2.9            |
| 3    | 2      | 2      | 3   | 1     | 3     | A     | 11.8514015             | 3.9             |
| 3    | 2      | 2      | 3   | 1     | 3     | E     | 11.6934375             | -0.1            |
| 4    | 2      | 3      | 4   | 1     | 4     | A     | 14.3612045             | -0.5            |
| 4    | 2      | 3      | 4   | 1     | 4     | E     | 14.2809844             | -1.0            |
| 5    | 2      | 4      | 5   | 1     | 5     | A     | 17.4069032             | 1.7             |
| 5    | 2      | 4      | 5   | 1     | 5     | E     | 17.3497286             | -1.5            |
| 6    | 2      | 5      | 6   | 1     | 6     | A     | 20.8428224             | 2.4             |
| 6    | 2      | 5      | 6   | 1     | 6     | E     | 20.7915100             | -3.2            |
| 7    | 2      | 6      | 7   | 1     | 7     | A     | 24.5198440             | 4.5             |
| 7    | 2      | 6      | 7   | 1     | 7     | E     | 24.4670829             | -5.9            |
| 4    | 2      | 2      | 4   | 1     | 3     | A     | 7.3881670              | -1.0            |
| 4    | 2      | 2      | 4   | 1     | 3     | E     | 7.4055401              | -1.5            |
| 5    | 2      | 3      | 5   | 1     | 4     | A     | 9.4255523              | -4.0            |
| 5    | 2      | 3      | 5   | 1     | 4     | E     | 9.4340706              | -0.3            |
| 6    | 2      | 4      | 6   | 1     | 5     | A     | 12.8427814             | -0.7            |
| 6    | 2      | 4      | 6   | 1     | 5     | E     | 12.8549893             | 0.0             |
| 7    | 2      | 5      | 7   | 1     | 6     | A     | 17.2458424             | 0.2             |
| 7    | 2      | 5      | 7   | 1     | 6     | E     | 17.2553205             | -1.0            |
| 8    | 2      | 6      | 8   | 1     | 7     | A     | 21.9693908             | 1.5             |
| 8    | 2      | 6      | 8   | 1     | 7     | E     | 21.9643763             | -1.3            |
| 3    | 2      | 1      | 2   | 2     | 0     | A     | 16.4834931             | -4.3            |
| 3    | 2      | 1      | 2   | 2     | 0     | E     | 16.2766391             | 1.3             |
| 4    | 2      | 2      | 3   | 2     | 1     | A     | 22.4869773             | 2.2             |
| 4    | 2      | 2      | 3   | 2     | 1     | E     | 22.4123978             | 0.7             |
| 3    | 2      | 2      | 2   | 2     | 1     | A     | 15.2980804             | -2.7            |
| 3    | 2      | 2      | 2   | 2     | 1     | E     | 15.5107554             | 2.2             |
| 4    | 2      | 3      | 3   | 2     | 2     | A     | 20.1302950             | -0.2            |
| 4    | 2      | 3      | 3   | 2     | 2     | E     | 20.2088846             | 1.3             |
| 5    | 2      | 4      | 4   | 2     | 3     | A     | 24.7558935             | 0.0             |
| 5    | 2      | 4      | 4   | 2     | 3     | E     | 24.7770456             | -0.4            |
| 4    | 1      | 3      | 3   | 2     | 2     | A     | 16.6202069             | -6.6            |
| 4    | 1      | 3      | 3   | 2     | 2     | E     | 16.7859179             | 0.5             |

| $J'$ | $K_a'$ | $K_c'$ | $J$ | $K_a$ | $K_c$ | $Sym$ | $\nu_{obs}/\text{GHz}$ | $\nu_o - \nu_c$ |
|------|--------|--------|-----|-------|-------|-------|------------------------|-----------------|
| 5    | 1      | 4      | 4   | 2     | 3     | A     | 22.7268725             | 1.0             |
| 5    | 1      | 4      | 4   | 2     | 3     | E     | 22.7988445             | -1.3            |
| 4    | 3      | 2      | 3   | 3     | 1     | A     | 20.9169580             | -6.6            |
| 4    | 3      | 2      | 3   | 3     | 1     | E     | 21.0900728             | 7.4             |
| 4    | 3      | 1      | 3   | 3     | 0     | E     | 21.1218262             | -1.6            |
| 3    | 3      | 0      | 3   | 2     | 1     | A     | 12.5290723             | 10.2            |
| 3    | 3      | 0      | 3   | 2     | 1     | E     | 13.0126501             | 3.9             |
| 4    | 3      | 1      | 4   | 2     | 2     | A     | 11.3288895             | -8.2            |
| 4    | 3      | 1      | 4   | 2     | 2     | E     | 11.7220751             | -1.7            |
| 5    | 3      | 2      | 5   | 2     | 3     | A     | 10.3037722             | -4.5            |
| 5    | 3      | 2      | 5   | 2     | 3     | E     | 10.4630188             | -3.9            |
| 6    | 3      | 3      | 6   | 2     | 4     | A     | 10.1751023             | -1.7            |
| 6    | 3      | 3      | 6   | 2     | 4     | E     | 10.2136144             | -1.7            |
| 7    | 3      | 4      | 7   | 2     | 5     | A     | 11.4444999             | -3.6            |
| 7    | 3      | 4      | 7   | 2     | 5     | E     | 11.4591556             | 0.5             |
| 8    | 3      | 5      | 8   | 2     | 6     | A     | 14.3095361             | -5.9            |
| 8    | 3      | 5      | 8   | 2     | 6     | E     | 14.3321981             | 2.3             |
| 9    | 3      | 6      | 9   | 2     | 7     | A     | 18.5435509             | -6.3            |
| 9    | 3      | 6      | 9   | 2     | 7     | E     | 18.5737497             | 1.8             |
| 3    | 3      | 1      | 3   | 2     | 2     | A     | 13.9845438             | 9.9             |
| 3    | 3      | 1      | 3   | 2     | 2     | E     | 13.3518580             | -0.1            |
| 4    | 3      | 2      | 4   | 2     | 3     | A     | 14.7712035             | 0.2             |
| 4    | 3      | 2      | 4   | 2     | 3     | E     | 14.2330388             | -1.4            |
| 5    | 3      | 3      | 5   | 2     | 4     | A     | 16.1494262             | -0.2            |
| 5    | 3      | 3      | 5   | 2     | 4     | E     | 15.8610002             | 2.6             |
| 6    | 3      | 4      | 6   | 2     | 5     | A     | 18.1832263             | 0.6             |
| 6    | 3      | 4      | 6   | 2     | 5     | E     | 18.0420238             | 4.0             |
| 7    | 3      | 5      | 7   | 2     | 6     | A     | 20.8413528             | -1.2            |
| 7    | 3      | 5      | 7   | 2     | 6     | E     | 20.7555261             | 2.4             |
| 8    | 3      | 6      | 8   | 2     | 7     | A     | 24.0111625             | 0.6             |
| 8    | 3      | 6      | 8   | 2     | 7     | E     | 23.9461906             | -0.3            |
| 4    | 4      | 1      | 4   | 3     | 2     | A     | 18.8784859             | -9.4            |
| 4    | 4      | 1      | 4   | 3     | 2     | E     | 18.3418855             | -16.9           |
| 5    | 4      | 2      | 5   | 3     | 3     | A     | 18.9818512             | -0.7            |
| 5    | 4      | 2      | 5   | 3     | 3     | E     | 18.2304124             | -10.5           |
| 6    | 4      | 3      | 6   | 3     | 4     | A     | 19.4163791             | 3.5             |
| 6    | 4      | 3      | 6   | 3     | 4     | E     | 18.6897685             | 0.6             |
| 7    | 4      | 4      | 7   | 3     | 5     | A     | 20.3660599             | 2.8             |
| 7    | 4      | 4      | 7   | 3     | 5     | E     | 19.9004442             | 10.3            |
| 8    | 4      | 5      | 8   | 3     | 6     | A     | 21.9557996             | -2.6            |
| 8    | 4      | 5      | 8   | 3     | 6     | E     | 21.7199211             | 12.8            |
| 9    | 4      | 6      | 9   | 3     | 7     | A     | 24.2167969             | -4.3            |
| 9    | 4      | 6      | 9   | 3     | 7     | E     | 24.0860738             | 9.8             |
| 4    | 4      | 0      | 4   | 3     | 1     | A     | 18.4533510             | -10.8           |
| 4    | 4      | 0      | 4   | 3     | 1     | E     | 18.7822010             | 12.8            |
| 5    | 4      | 1      | 5   | 3     | 2     | A     | 17.5232971             | -2.2            |
| 5    | 4      | 1      | 5   | 3     | 2     | E     | 18.0624679             | 7.9             |
| 6    | 4      | 2      | 6   | 3     | 3     | A     | 16.0087865             | 1.0             |
| 6    | 4      | 2      | 6   | 3     | 3     | E     | 16.5239639             | -0.9            |

| $J'$ | $K_a'$ | $K_c'$ | $J$ | $K_a$ | $K_c$ | $Sym$ | $\nu_{obs}/\text{GHz}$ | $\nu_o - \nu_c$ |
|------|--------|--------|-----|-------|-------|-------|------------------------|-----------------|
| 7    | 4      | 3      | 7   | 3     | 4     | A     | 14.3522632             | 0.8             |
| 7    | 4      | 3      | 7   | 3     | 4     | E     | 14.6232102             | -7.6            |
| 8    | 4      | 4      | 8   | 3     | 5     | A     | 13.3481835             | -2.5            |
| 8    | 4      | 4      | 8   | 3     | 5     | E     | 13.4255435             | -4.8            |
| 9    | 4      | 5      | 9   | 3     | 6     | A     | 13.7026778             | -6.5            |
| 9    | 4      | 5      | 9   | 3     | 6     | E     | 13.7235877             | -0.2            |
| 5    | 5      | 1      | 5   | 4     | 2     | A     | 24.1551978             | 5.6             |

**Table S8:** Observed frequencies ( $\nu_{obs}$ ) of the  $^{34}\text{S}$  isotopologues of 2MTP.  $J$ ,  $K_a$  and  $K_c$  are the quantum numbers for an asymmetric top.  $Sym$  is for the respective torsional A or E species. Observed minus calculated ( $\nu_o - \nu_c$ ) values (in kHz) as obtained after a fit with the program *XIAM*.

| $J'$ | $K_a'$ | $K_c'$ | $J$ | $K_a$ | $K_c$ | $Sym$ | $\nu_{obs}$ / GHz | $\nu_o - \nu_c$ |
|------|--------|--------|-----|-------|-------|-------|-------------------|-----------------|
| 2    | 0      | 2      | 1   | 0     | 1     | A     | 9.7924902         | -0.7            |
| 3    | 0      | 3      | 2   | 0     | 2     | A     | 13.9701075        | -1.3            |
| 3    | 0      | 3      | 2   | 0     | 2     | E     | 13.9638823        | 2.0             |
| 4    | 0      | 4      | 3   | 0     | 3     | A     | 17.8299880        | -1.4            |
| 4    | 0      | 4      | 3   | 0     | 3     | E     | 17.8228123        | 4.0             |
| 5    | 0      | 5      | 4   | 0     | 4     | A     | 21.6592420        | -1.8            |
| 5    | 0      | 5      | 4   | 0     | 4     | E     | 21.6532079        | 1.4             |
| 1    | 1      | 1      | 0   | 0     | 0     | E     | 7.0749852         | -0.1            |
| 2    | 1      | 2      | 1   | 0     | 1     | A     | 11.0654144        | -0.2            |
| 2    | 1      | 2      | 1   | 0     | 1     | E     | 11.0356446        | 2.4             |
| 3    | 1      | 3      | 2   | 0     | 2     | A     | 14.5844759        | -0.6            |
| 3    | 1      | 3      | 2   | 0     | 2     | E     | 14.5638346        | 2.2             |
| 4    | 1      | 4      | 3   | 0     | 3     | A     | 18.0766208        | -1.2            |
| 4    | 1      | 4      | 3   | 0     | 3     | E     | 18.0627118        | 2.0             |
| 5    | 1      | 5      | 4   | 0     | 4     | A     | 21.7476539        | -0.9            |
| 5    | 1      | 5      | 4   | 0     | 4     | E     | 21.7388521        | 2.4             |
| 1    | 1      | 0      | 1   | 0     | 1     | E     | 3.2385089         | 2.0             |
| 2    | 1      | 1      | 2   | 0     | 2     | E     | 4.7208033         | 1.0             |
| 3    | 1      | 2      | 3   | 0     | 3     | A     | 7.4241107         | 0.7             |
| 3    | 1      | 2      | 3   | 0     | 3     | E     | 7.4255676         | 0.6             |
| 4    | 1      | 3      | 4   | 0     | 4     | A     | 11.2240290        | 1.2             |
| 4    | 1      | 3      | 4   | 0     | 4     | E     | 11.2228121        | -2.1            |
| 5    | 1      | 4      | 5   | 0     | 5     | A     | 15.5533553        | 2.5             |
| 5    | 1      | 4      | 5   | 0     | 5     | E     | 15.5423085        | -4.3            |
| 6    | 1      | 5      | 6   | 0     | 6     | A     | 19.8735277        | 5.5             |
| 6    | 1      | 5      | 6   | 0     | 6     | E     | 19.8476466        | -4.4            |
| 7    | 1      | 6      | 7   | 0     | 7     | A     | 24.0027765        | -0.4            |
| 2    | 0      | 2      | 1   | 1     | 1     | A     | 7.7347798         | -6.2            |
| 2    | 0      | 2      | 1   | 1     | 1     | E     | 7.7926252         | 2.2             |
| 3    | 0      | 3      | 2   | 1     | 2     | A     | 12.6971855        | 0.4             |
| 3    | 0      | 3      | 2   | 1     | 2     | E     | 12.7182304        | 1.9             |
| 4    | 0      | 4      | 3   | 1     | 3     | A     | 17.2156201        | -1.6            |
| 4    | 0      | 4      | 3   | 1     | 3     | E     | 17.2228569        | 1.5             |
| 5    | 0      | 5      | 4   | 1     | 4     | A     | 21.4126086        | -2.6            |
| 5    | 0      | 5      | 4   | 1     | 4     | E     | 21.4133061        | 1.0             |
| 2    | 1      | 1      | 1   | 1     | 0     | A     | 11.3030036        | -6.2            |
| 2    | 1      | 1      | 1   | 1     | 0     | E     | 11.2722871        | 0.5             |
| 3    | 1      | 2      | 2   | 1     | 1     | A     | 16.6783421        | -1.2            |
| 3    | 1      | 2      | 2   | 1     | 1     | E     | 16.6686445        | 0.3             |
| 2    | 1      | 2      | 1   | 1     | 1     | A     | 9.0077056         | -4.1            |
| 2    | 1      | 2      | 1   | 1     | 1     | E     | 9.0382753         | 1.3             |
| 3    | 1      | 3      | 2   | 1     | 2     | A     | 13.3115518        | -1.0            |
| 3    | 1      | 3      | 2   | 1     | 2     | E     | 13.3181828        | 1.4             |

| $J'$ | $K_a'$ | $K_c'$ | $J$ | $K_a$ | $K_c$ | $Sym$ | $\nu_{obs}/\text{GHz}$ | $\nu_o - \nu_c$ |
|------|--------|--------|-----|-------|-------|-------|------------------------|-----------------|
| 4    | 1      | 4      | 3   | 1     | 3     | A     | 17.4622531             | -1.2            |
| 4    | 1      | 4      | 3   | 1     | 3     | E     | 17.4627590             | 2.1             |
| 5    | 1      | 5      | 4   | 1     | 4     | A     | 21.5010200             | -2.2            |
| 5    | 1      | 5      | 4   | 1     | 4     | E     | 21.4989505             | 2.2             |
| 2    | 2      | 1      | 1   | 1     | 0     | A     | 17.4760807             | 9.9             |
| 2    | 2      | 1      | 1   | 1     | 0     | E     | 17.0728841             | -3.3            |
| 2    | 2      | 1      | 2   | 1     | 2     | A     | 9.6160246              | 11.8            |
| 2    | 2      | 1      | 2   | 1     | 2     | E     | 9.2757492              | -2.9            |
| 3    | 2      | 2      | 3   | 1     | 3     | A     | 11.5374781             | 6.6             |
| 3    | 2      | 2      | 3   | 1     | 3     | E     | 11.3957671             | 0.4             |
| 4    | 2      | 3      | 4   | 1     | 4     | A     | 14.0965674             | 3.4             |
| 4    | 2      | 3      | 4   | 1     | 4     | E     | 14.0239052             | -0.6            |
| 5    | 2      | 4      | 5   | 1     | 5     | A     | 17.1845277             | -1.8            |
| 5    | 2      | 4      | 5   | 1     | 5     | E     | 17.1316581             | -1.4            |
| 6    | 2      | 5      | 6   | 1     | 6     | A     | 20.6435157             | 1.1             |
| 6    | 2      | 5      | 6   | 1     | 6     | E     | 20.5950092             | -4.5            |
| 7    | 2      | 6      | 7   | 1     | 7     | A     | 24.3208140             | -0.1            |
| 4    | 2      | 2      | 4   | 1     | 3     | A     | 7.2125207              | 0.5             |
| 4    | 2      | 2      | 4   | 1     | 3     | E     | 7.2277703              | 3.9             |
| 5    | 2      | 3      | 5   | 1     | 4     | A     | 9.4418207              | -1.1            |
| 5    | 2      | 3      | 5   | 1     | 4     | E     | 9.4511807              | 0.4             |
| 6    | 2      | 4      | 6   | 1     | 5     | A     | 13.0415634             | -2.9            |
| 6    | 2      | 4      | 6   | 1     | 5     | E     | 13.0541242             | -1.9            |
| 7    | 2      | 5      | 7   | 1     | 6     | A     | 17.5156420             | -0.8            |
| 7    | 2      | 5      | 7   | 1     | 6     | E     | 17.5228281             | -3.0            |
| 3    | 2      | 1      | 2   | 2     | 0     | A     | 16.4959228             | -12.0           |
| 3    | 2      | 1      | 2   | 2     | 0     | E     | 16.2966934             | -2.9            |
| 4    | 2      | 2      | 3   | 2     | 1     | A     | 22.4889090             | 6.4             |
| 4    | 2      | 2      | 3   | 2     | 1     | E     | 22.4228642             | 0.8             |
| 3    | 2      | 2      | 2   | 2     | 1     | A     | 15.2330048             | -6.6            |
| 3    | 2      | 2      | 2   | 2     | 1     | E     | 15.4382020             | 6.0             |
| 4    | 2      | 3      | 3   | 2     | 2     | A     | 20.0213479             | 1.1             |
| 4    | 2      | 3      | 3   | 2     | 2     | E     | 20.0908977             | 1.7             |
| 5    | 2      | 4      | 4   | 2     | 3     | A     | 24.5889866             | -1.2            |
| 5    | 2      | 4      | 4   | 2     | 3     | E     | 24.6067008             | -1.2            |
| 4    | 1      | 3      | 3   | 2     | 2     | A     | 16.9021807             | 2.6             |
| 4    | 1      | 3      | 3   | 2     | 2     | E     | 17.0499022             | -0.8            |
| 5    | 1      | 4      | 4   | 2     | 3     | A     | 22.8693976             | -2.4            |
| 5    | 1      | 4      | 4   | 2     | 3     | E     | 22.9317101             | -2.0            |
| 4    | 3      | 2      | 3   | 3     | 1     | E     | 21.0544536             | 10.6            |
| 4    | 3      | 1      | 3   | 3     | 0     | E     | 21.1047552             | -7.2            |
| 3    | 3      | 0      | 3   | 2     | 1     | A     | 11.8077325             | -12.3           |
| 3    | 3      | 0      | 3   | 2     | 1     | E     | 12.2842365             | 11.9            |
| 4    | 3      | 1      | 4   | 2     | 2     | A     | 10.6055197             | -4.6            |
| 4    | 3      | 1      | 4   | 2     | 2     | E     | 10.9661274             | 3.8             |
| 5    | 3      | 2      | 5   | 2     | 3     | A     | 9.6872973              | 0.2             |
| 5    | 3      | 2      | 5   | 2     | 3     | E     | 9.8179171              | -2.5            |
| 6    | 3      | 3      | 6   | 2     | 4     | A     | 9.7884951              | -2.0            |
| 6    | 3      | 3      | 6   | 2     | 4     | E     | 9.8191275              | 0.0             |



| $J'$ | $K_a'$ | $K_c'$ | $J$ | $K_a$ | $K_c$ | $Sym$ | $\nu_{obs}/\text{GHz}$ | $\nu_o - \nu_c$ |
|------|--------|--------|-----|-------|-------|-------|------------------------|-----------------|
| 7    | 3      | 4      | 7   | 2     | 5     | A     | 11.3789027             | -4.9            |
| 7    | 3      | 4      | 7   | 2     | 5     | E     | 11.3947939             | -0.2            |
| 8    | 3      | 5      | 8   | 2     | 6     | A     | 14.5831301             | -4.2            |
| 8    | 3      | 5      | 8   | 2     | 6     | E     | 14.6083768             | 0.4             |
| 9    | 3      | 6      | 9   | 2     | 7     | A     | 19.0357784             | -5.5            |
| 9    | 3      | 6      | 9   | 2     | 7     | E     | 19.0645361             | -1.8            |
| 3    | 3      | 1      | 3   | 2     | 2     | A     | 13.3573890             | -0.3            |
| 3    | 3      | 1      | 3   | 2     | 2     | E     | 12.7393343             | -9.0            |
| 4    | 3      | 2      | 4   | 2     | 3     | A     | 14.1998026             | -1.8            |
| 4    | 3      | 2      | 4   | 2     | 3     | E     | 13.7028899             | -0.4            |
| 5    | 3      | 3      | 5   | 2     | 4     | A     | 15.6618607             | 1.3             |
| 5    | 3      | 3      | 5   | 2     | 4     | E     | 15.4124244             | 5.3             |
| 6    | 3      | 4      | 6   | 2     | 5     | A     | 17.7957809             | -1.1            |
| 6    | 3      | 4      | 6   | 2     | 5     | E     | 17.6738582             | 5.0             |
| 7    | 3      | 5      | 7   | 2     | 6     | A     | 20.5503073             | -3.1            |
| 7    | 3      | 5      | 7   | 2     | 6     | E     | 20.4743966             | -1.9            |
| 8    | 3      | 6      | 8   | 2     | 7     | A     | 23.7927846             | 0.3             |
| 4    | 4      | 1      | 4   | 3     | 2     | A     | 17.9561466             | -1.6            |
| 4    | 4      | 1      | 4   | 3     | 2     | E     | 17.4097136             | -15.5           |
| 5    | 4      | 2      | 5   | 3     | 3     | A     | 18.0925880             | 4.1             |
| 5    | 4      | 2      | 5   | 3     | 3     | E     | 17.3474352             | -9.2            |
| 6    | 4      | 3      | 6   | 3     | 4     | A     | 18.6011769             | 5.9             |
| 6    | 4      | 3      | 6   | 3     | 4     | E     | 17.9288574             | 6.3             |
| 7    | 4      | 4      | 7   | 3     | 5     | A     | 19.6686171             | -1.8            |
| 7    | 4      | 4      | 7   | 3     | 5     | E     | 19.2742285             | 17.9            |
| 8    | 4      | 5      | 8   | 3     | 6     | E     | 21.2127848             | 15.2            |
| 9    | 4      | 6      | 9   | 3     | 7     | E     | 23.7133065             | 7.0             |
| 5    | 4      | 1      | 5   | 3     | 2     | A     | 16.4582484             | 2.3             |
| 5    | 4      | 1      | 5   | 3     | 2     | E     | 17.0012636             | 14.4            |
| 6    | 4      | 2      | 6   | 3     | 3     | A     | 14.8901597             | 0.8             |
| 6    | 4      | 2      | 6   | 3     | 3     | E     | 15.3633110             | -3.5            |
| 7    | 4      | 3      | 7   | 3     | 4     | A     | 13.3261262             | -2.9            |
| 7    | 4      | 3      | 7   | 3     | 4     | E     | 13.5421232             | -16.5           |
| 8    | 4      | 4      | 8   | 3     | 5     | A     | 12.6154160             | -8.1            |
| 8    | 4      | 4      | 8   | 3     | 5     | E     | 12.6709940             | -12.4           |

**Table S9:** Observed frequencies ( $\nu_{obs}$ ) of the  $^{13}\text{C}(2)$  isotopologues of 2MTP.  $J$ ,  $K_a$  and  $K_c$  are the quantum numbers for an asymmetric top.  $Sym$  is for the respective torsional A or E species. Observed minus calculated ( $\nu_o - \nu_c$ ) values (in kHz) as obtained after a fit with the program *XIAM*.

| $J'$ | $K_a'$ | $K_c'$ | $J$ | $K_a$ | $K_c$ | $Sym$ | $\nu_{obs} / \text{GHz}$ | $\nu_o - \nu_c$ |
|------|--------|--------|-----|-------|-------|-------|--------------------------|-----------------|
| 2    | 0      | 2      | 1   | 0     | 1     | A     | 9.8315413                | -0.3            |
| 2    | 0      | 2      | 1   | 0     | 1     | E     | 9.8292631                | -0.4            |
| 3    | 0      | 3      | 2   | 0     | 2     | A     | 14.0732712               | 0.6             |
| 3    | 0      | 3      | 2   | 0     | 2     | E     | 14.0673038               | 0.1             |
| 4    | 0      | 4      | 3   | 0     | 3     | A     | 17.9822024               | 0.1             |
| 4    | 0      | 4      | 3   | 0     | 3     | E     | 17.9748997               | -1.0            |
| 5    | 0      | 5      | 4   | 0     | 4     | A     | 21.8378091               | 1.1             |
| 5    | 0      | 5      | 4   | 0     | 4     | E     | 21.8314656               | 0.9             |
| 2    | 1      | 2      | 1   | 0     | 1     | A     | 11.2454725               | -1.4            |
| 2    | 1      | 2      | 1   | 0     | 1     | E     | 11.2137564               | -0.6            |
| 3    | 1      | 3      | 2   | 0     | 2     | A     | 14.7917708               | -1.5            |
| 3    | 1      | 3      | 2   | 0     | 2     | E     | 14.7696727               | 0.1             |
| 4    | 1      | 4      | 3   | 0     | 3     | A     | 18.2873331               | 0.0             |
| 4    | 1      | 4      | 3   | 0     | 3     | E     | 18.2720863               | 0.0             |
| 5    | 1      | 5      | 4   | 0     | 4     | A     | 21.9534767               | -0.4            |
| 5    | 1      | 5      | 4   | 0     | 4     | E     | 21.9436790               | 0.3             |
| 3    | 1      | 2      | 3   | 0     | 3     | A     | 7.3848872                | 0.9             |
| 3    | 1      | 2      | 3   | 0     | 3     | E     | 7.3859754                | 0.8             |
| 4    | 1      | 3      | 4   | 0     | 4     | A     | 11.0966084               | 0.2             |
| 4    | 1      | 3      | 4   | 0     | 4     | E     | 11.0956536               | -1.2            |
| 5    | 1      | 4      | 5   | 0     | 5     | A     | 15.4200948               | 1.2             |
| 5    | 1      | 4      | 5   | 0     | 5     | E     | 15.4105734               | -1.7            |
| 2    | 0      | 2      | 1   | 1     | 1     | E     | 7.6893596                | 2.7             |
| 3    | 0      | 3      | 2   | 1     | 2     | A     | 12.6593414               | 3.0             |
| 3    | 0      | 3      | 2   | 1     | 2     | E     | 12.6828107               | 0.5             |
| 4    | 0      | 4      | 3   | 1     | 3     | A     | 17.2637018               | 1.2             |
| 4    | 0      | 4      | 3   | 1     | 3     | E     | 17.2725305               | -1.3            |
| 5    | 0      | 5      | 4   | 1     | 4     | A     | 21.5326770               | -0.2            |
| 5    | 0      | 5      | 4   | 1     | 4     | E     | 21.5342786               | -0.4            |
| 2    | 1      | 1      | 1   | 1     | 0     | A     | 11.2847320               | -13.4           |
| 2    | 1      | 1      | 1   | 1     | 0     | E     | 11.2518822               | 3.7             |
| 3    | 1      | 2      | 2   | 1     | 1     | A     | 16.6787892               | 3.6             |
| 3    | 1      | 2      | 2   | 1     | 1     | E     | 16.6686899               | 0.8             |
| 4    | 1      | 3      | 3   | 1     | 2     | A     | 21.6939249               | 0.8             |
| 4    | 1      | 3      | 3   | 1     | 2     | E     | 21.6845801               | -0.8            |
| 2    | 1      | 2      | 1   | 1     | 1     | A     | 9.0411175                | -2.9            |
| 2    | 1      | 2      | 1   | 1     | 1     | E     | 9.0738513                | 0.8             |
| 3    | 1      | 3      | 2   | 1     | 2     | A     | 13.3778425               | 2.5             |
| 3    | 1      | 3      | 2   | 1     | 2     | E     | 13.3851806               | 1.5             |
| 4    | 1      | 4      | 3   | 1     | 3     | A     | 17.5688320               | 0.6             |
| 4    | 1      | 4      | 3   | 1     | 3     | E     | 17.5697177               | 0.3             |
| 5    | 1      | 5      | 4   | 1     | 4     | A     | 21.6483465               | 0.1             |
| 5    | 1      | 5      | 4   | 1     | 4     | E     | 21.6464900               | -3.0            |

| $J'$ | $K_a'$ | $K_c'$ | $J$ | $K_a$ | $K_c$ | $Sym$ | $\nu_{obs} / \text{GHz}$ | $\nu_o - \nu_c$ |
|------|--------|--------|-----|-------|-------|-------|--------------------------|-----------------|
| 2    | 2      | 1      | 1   | 1     | 0     | A     | 17.8977434               | -1.6            |
| 2    | 2      | 1      | 1   | 1     | 0     | E     | 17.4665764               | 0.4             |
| 2    | 2      | 1      | 2   | 1     | 2     | A     | 9.9784422                | 3.5             |
| 2    | 2      | 1      | 2   | 1     | 2     | E     | 9.6147926                | -0.6            |
| 3    | 2      | 2      | 3   | 1     | 3     | A     | 11.8449680               | 0.8             |
| 3    | 2      | 2      | 3   | 1     | 3     | E     | 11.6861905               | -0.6            |
| 4    | 2      | 3      | 4   | 1     | 4     | A     | 14.3385539               | -2.2            |
| 4    | 2      | 3      | 4   | 1     | 4     | E     | 14.2580605               | 2.7             |

**Table S10:** Observed frequencies ( $\nu_{obs}$ ) of the  $^{13}\text{C}(3)$  isotopologues of 2MTP.  $J$ ,  $K_a$  and  $K_c$  are the quantum numbers for an asymmetric top.  $Sym$  is for the respective torsional A or E species. Observed minus calculated ( $\nu_o - \nu_c$ ) values (in kHz) as obtained after a fit with the program *XIAM*.

| $J'$ | $K_a'$ | $K_c'$ | $J$ | $K_a$ | $K_c$ | $Sym$ | $\nu_{obs} / \text{GHz}$ | $\nu_o - \nu_c$ |
|------|--------|--------|-----|-------|-------|-------|--------------------------|-----------------|
| 2    | 0      | 2      | 1   | 0     | 1     | A     | 9.8122561                | 0.3             |
| 2    | 0      | 2      | 1   | 0     | 1     | E     | 9.8098187                | -0.1            |
| 3    | 0      | 3      | 2   | 0     | 2     | A     | 14.0080462               | 0.3             |
| 3    | 0      | 3      | 2   | 0     | 2     | E     | 14.0018887               | -0.2            |
| 4    | 0      | 4      | 3   | 0     | 3     | A     | 17.8822913               | 0.4             |
| 4    | 0      | 4      | 3   | 0     | 3     | E     | 17.8751027               | 0.3             |
| 5    | 0      | 5      | 4   | 0     | 4     | A     | 21.7213255               | 0.2             |
| 5    | 0      | 5      | 4   | 0     | 4     | E     | 21.7152451               | 0.8             |
| 2    | 1      | 2      | 1   | 0     | 1     | A     | 11.1147941               | -2.4            |
| 2    | 1      | 2      | 1   | 0     | 1     | E     | 11.0847477               | 1.1             |
| 3    | 1      | 3      | 2   | 0     | 2     | A     | 14.6435233               | -2.0            |
| 3    | 1      | 3      | 2   | 0     | 2     | E     | 14.6226520               | 2.2             |
| 4    | 1      | 4      | 3   | 0     | 3     | A     | 18.1403999               | -1.3            |
| 4    | 1      | 4      | 3   | 0     | 3     | E     | 18.1262598               | -0.1            |
| 5    | 1      | 5      | 4   | 0     | 4     | A     | 21.8149292               | -1.5            |
| 5    | 1      | 5      | 4   | 0     | 4     | E     | 21.8059560               | -0.5            |
| 4    | 1      | 3      | 4   | 0     | 4     | A     | 11.2109949               | 2.4             |
| 4    | 1      | 3      | 4   | 0     | 4     | E     | 11.2098371               | -5.7            |
| 5    | 1      | 4      | 5   | 0     | 5     | A     | 15.5455005               | -3.7            |
| 5    | 1      | 4      | 5   | 0     | 5     | E     | 15.5348202               | 6.6             |
| 2    | 0      | 2      | 1   | 1     | 1     | A     | 7.7226778                | -3.1            |
| 3    | 0      | 3      | 2   | 1     | 2     | A     | 12.7055082               | 3.1             |
| 3    | 0      | 3      | 2   | 1     | 2     | E     | 12.7269630               | 1.9             |
| 4    | 0      | 4      | 3   | 1     | 3     | A     | 17.2468119               | 0.4             |
| 4    | 0      | 4      | 3   | 1     | 3     | E     | 17.2543400               | -1.5            |
| 5    | 0      | 5      | 4   | 1     | 4     | A     | 21.4632155               | 0.6             |
| 5    | 0      | 5      | 4   | 1     | 4     | E     | 21.4640862               | -0.5            |
| 2    | 1      | 1      | 1   | 1     | 0     | A     | 11.3126021               | -1.8            |
| 2    | 1      | 1      | 1   | 1     | 0     | E     | 11.2816394               | 2.7             |
| 3    | 1      | 2      | 2   | 1     | 1     | A     | 16.6983536               | 3.1             |

| $J'$ | $K_a'$ | $K_c'$ | $J$ | $K_a$ | $K_c$ | $Sym$ | $\nu_{obs} / \text{GHz}$ | $\nu_o - \nu_c$ |
|------|--------|--------|-----|-------|-------|-------|--------------------------|-----------------|
| 3    | 1      | 2      | 2   | 1     | 1     | E     | 16.6886495               | -0.4            |
| 4    | 1      | 3      | 3   | 1     | 2     | A     | 21.6693625               | -0.9            |
| 4    | 1      | 3      | 3   | 1     | 2     | E     | 21.6596731               | -4.6            |
| 2    | 1      | 2      | 1   | 1     | 1     | A     | 9.0252191                | -2.6            |
| 2    | 1      | 2      | 1   | 1     | 1     | E     | 9.0560591                | 1.3             |
| 3    | 1      | 3      | 2   | 1     | 2     | A     | 13.3409846               | 0.1             |
| 3    | 1      | 3      | 2   | 1     | 2     | E     | 13.3477220               | 0.0             |
| 4    | 1      | 4      | 3   | 1     | 3     | A     | 17.5049226               | 0.8             |
| 4    | 1      | 4      | 3   | 1     | 3     | E     | 17.5054992               | 0.2             |
| 5    | 1      | 5      | 4   | 1     | 4     | A     | 21.5568222               | 1.9             |
| 5    | 1      | 5      | 4   | 1     | 4     | E     | 21.5547996               | 0.7             |
| 2    | 2      | 1      | 1   | 1     | 0     | A     | 17.5812743               | 0.9             |
| 2    | 2      | 1      | 1   | 1     | 0     | E     | 17.1738654               | -0.2            |
| 3    | 2      | 2      | 3   | 1     | 3     | A     | 11.6121018               | -0.6            |
| 3    | 2      | 2      | 3   | 1     | 3     | E     | 11.4676603               | 1.0             |
| 4    | 2      | 3      | 4   | 1     | 4     | A     | 14.1607852               | 2.0             |
| 5    | 2      | 4      | 5   | 1     | 5     | E     | 14.0868480               | -2.3            |

**Table S11:** Observed frequencies ( $\nu_{obs}$ ) of the  $^{13}\text{C}(4)$  isotopologues of 2MTP.  $J$ ,  $K_a$  and  $K_c$  are the quantum numbers for an asymmetric top.  $Sym$  is for the respective torsional A or E species. Observed minus calculated ( $\nu_o - \nu_c$ ) values (in kHz) as obtained after a fit with the program *XIAM*.

| $J'$ | $K_a'$ | $K_c'$ | $J$ | $K_a$ | $K_c$ | $Sym$ | $\nu_{obs} / \text{GHz}$ | $\nu_o - \nu_c$ |
|------|--------|--------|-----|-------|-------|-------|--------------------------|-----------------|
| 2    | 0      | 2      | 1   | 0     | 1     | A     | 9.7469532                | 0.1             |
| 2    | 0      | 2      | 1   | 0     | 1     | E     | 9.7446943                | -0.2            |
| 3    | 0      | 3      | 2   | 0     | 2     | A     | 13.9443347               | 1.3             |
| 3    | 0      | 3      | 2   | 0     | 2     | E     | 13.9383947               | -0.5            |
| 4    | 0      | 4      | 3   | 0     | 3     | A     | 17.8136786               | 0.1             |
| 4    | 0      | 4      | 3   | 0     | 3     | E     | 17.8064743               | -1.1            |
| 5    | 0      | 5      | 4   | 0     | 4     | A     | 21.6339097               | 1.3             |
| 5    | 0      | 5      | 4   | 0     | 4     | E     | 21.6276907               | -1.8            |
| 2    | 1      | 2      | 1   | 0     | 1     | A     | 11.1261308               | 2.4             |
| 2    | 1      | 2      | 1   | 0     | 1     | E     | 11.0949708               | -0.5            |
| 3    | 1      | 3      | 2   | 0     | 2     | A     | 14.6393781               | -0.8            |
| 3    | 1      | 3      | 2   | 0     | 2     | E     | 14.6177017               | 1.3             |
| 4    | 1      | 4      | 3   | 0     | 3     | A     | 18.1061635               | -1.0            |
| 4    | 1      | 4      | 3   | 0     | 3     | E     | 18.0912767               | -1.7            |
| 5    | 1      | 5      | 4   | 0     | 4     | A     | 21.7437810               | 0.1             |
| 5    | 1      | 5      | 4   | 0     | 4     | E     | 21.7342550               | 0.1             |
| 3    | 1      | 2      | 3   | 0     | 3     | A     | 7.3330960                | 0.3             |
| 3    | 1      | 2      | 3   | 0     | 3     | E     | 7.3343825                | 1.4             |
| 4    | 1      | 3      | 4   | 0     | 4     | A     | 11.0310070               | 4.6             |
| 4    | 1      | 3      | 4   | 0     | 4     | E     | 11.0302429               | -1.5            |
| 5    | 1      | 4      | 5   | 0     | 5     | A     | 15.3228958               | 0.4             |
| 5    | 1      | 4      | 5   | 0     | 5     | E     | 15.3134914               | -3.1            |
| 6    | 1      | 5      | 6   | 0     | 6     | A     | 19.6657831               | 0.3             |

| $J'$ | $K_a'$ | $K_c'$ | $J$ | $K_a$ | $K_c$ | $Sym$ | $\nu_{obs} / \text{GHz}$ | $\nu_o - \nu_c$ |
|------|--------|--------|-----|-------|-------|-------|--------------------------|-----------------|
| 6    | 1      | 5      | 6   | 0     | 6     | E     | 19.6420202               | -1.0            |
| 2    | 0      | 2      | 1   | 1     | 1     | A     | 7.5842810                | -5.1            |
| 2    | 0      | 2      | 1   | 1     | 1     | E     | 7.6454374                | 1.6             |
| 3    | 0      | 3      | 2   | 1     | 2     | A     | 12.5651575               | -0.6            |
| 3    | 0      | 3      | 2   | 1     | 2     | E     | 12.5881207               | 2.3             |
| 4    | 0      | 4      | 3   | 1     | 3     | A     | 17.1186352               | 2.1             |
| 4    | 0      | 4      | 3   | 1     | 3     | E     | 17.1271695               | -0.7            |
| 5    | 0      | 5      | 4   | 1     | 4     | A     | 21.3414232               | 0.8             |
| 5    | 0      | 5      | 4   | 1     | 4     | E     | 21.3428892               | -0.4            |
| 2    | 1      | 1      | 1   | 1     | 0     | A     | 11.1980632               | -7.7            |
| 2    | 1      | 1      | 1   | 1     | 0     | E     | 11.1657523               | 3.4             |
| 3    | 1      | 2      | 2   | 1     | 1     | A     | 16.5463404               | 2.1             |
| 3    | 1      | 2      | 2   | 1     | 1     | E     | 16.5364562               | 1.2             |
| 4    | 1      | 3      | 3   | 1     | 2     | A     | 21.5115868               | 1.6             |
| 4    | 1      | 3      | 3   | 1     | 2     | E     | 21.5023373               | -1.4            |
| 2    | 1      | 2      | 1   | 1     | 1     | A     | 8.9634569                | -4.5            |
| 2    | 1      | 2      | 1   | 1     | 1     | E     | 8.9957119                | -0.8            |
| 3    | 1      | 3      | 2   | 1     | 2     | A     | 13.2602037               | 0.1             |
| 3    | 1      | 3      | 2   | 1     | 2     | E     | 13.2674238               | 0.2             |
| 4    | 1      | 4      | 3   | 1     | 3     | A     | 17.4111176               | -1.5            |
| 4    | 1      | 4      | 3   | 1     | 3     | E     | 17.4119741               | 0.9             |
| 5    | 1      | 5      | 4   | 1     | 4     | A     | 21.4512947               | -0.2            |
| 5    | 1      | 5      | 4   | 1     | 4     | E     | 21.4494524               | 0.4             |
| 2    | 2      | 1      | 1   | 1     | 0     | A     | 17.6860183               | 3.9             |
| 2    | 2      | 1      | 1   | 1     | 0     | E     | 17.2619539               | 2.2             |
| 2    | 2      | 1      | 2   | 1     | 2     | A     | 9.8398535                | -5.7            |
| 2    | 2      | 1      | 2   | 1     | 2     | E     | 9.4822455                | -1.8            |
| 3    | 2      | 2      | 3   | 1     | 3     | A     | 11.7007817               | 4.7             |
| 3    | 2      | 2      | 3   | 1     | 3     | E     | 11.5459381               | -3.1            |
| 4    | 2      | 3      | 4   | 1     | 4     | A     | 14.1856884               | -4.5            |
| 5    | 2      | 4      | 5   | 1     | 5     | A     | 17.2001975               | -2.2            |
| 5    | 2      | 4      | 5   | 1     | 5     | E     | 17.1444186               | 6.1             |

**Table S12:** Observed frequencies ( $\nu_{obs}$ ) of the  $^{13}\text{C}(5)$  isotopologues of 2MTP.  $J$ ,  $K_a$  and  $K_c$  are the quantum numbers for an asymmetric top.  $Sym$  is for the respective torsional A or E species. Observed minus calculated ( $\nu_o - \nu_c$ ) values (in kHz) as obtained after a fit with the program *XIAM*.

| $J'$ | $K_a'$ | $K_c'$ | $J$ | $K_a$ | $K_c$ | $Sym$ | $\nu_{obs} / \text{GHz}$ | $\nu_o - \nu_c$ |
|------|--------|--------|-----|-------|-------|-------|--------------------------|-----------------|
| 2    | 0      | 2      | 1   | 0     | 1     | A     | 9.7417230                | -1.7            |
| 2    | 0      | 2      | 1   | 0     | 1     | E     | 9.7395648                | 0.3             |
| 3    | 0      | 3      | 2   | 0     | 2     | A     | 13.9638420               | 4.6             |
| 3    | 0      | 3      | 2   | 0     | 2     | E     | 13.9580817               | -0.9            |
| 4    | 0      | 4      | 3   | 0     | 3     | A     | 17.8517619               | -2.8            |
| 4    | 0      | 4      | 3   | 0     | 3     | E     | 17.8445535               | -0.4            |
| 5    | 0      | 5      | 4   | 0     | 4     | A     | 21.6773603               | -1.6            |
| 5    | 0      | 5      | 4   | 0     | 4     | E     | 21.6710040               | -3.2            |
| 2    | 1      | 2      | 1   | 0     | 1     | A     | 11.2011232               | -0.9            |
| 2    | 1      | 2      | 1   | 0     | 1     | E     | 11.1690008               | -0.7            |
| 3    | 1      | 3      | 2   | 0     | 2     | A     | 14.7207413               | -1.9            |
| 3    | 1      | 3      | 2   | 0     | 2     | E     | 14.6983654               | -1.7            |
| 4    | 1      | 4      | 3   | 0     | 3     | A     | 18.1805445               | -1.3            |
| 4    | 1      | 4      | 3   | 0     | 3     | E     | 18.1649831               | 0.8             |
| 5    | 1      | 5      | 4   | 0     | 4     | A     | 21.8048350               | 0.8             |
| 5    | 1      | 5      | 4   | 0     | 4     | E     | 21.7947673               | 0.6             |
| 3    | 1      | 2      | 3   | 0     | 3     | A     | 7.2940898                | -3.5            |
| 3    | 1      | 2      | 3   | 0     | 3     | E     | 7.2951255                | -1.9            |
| 4    | 1      | 3      | 4   | 0     | 4     | A     | 10.9280457               | 2.9             |
| 4    | 1      | 3      | 4   | 0     | 4     | E     | 10.9272484               | -1.0            |
| 5    | 1      | 4      | 5   | 0     | 5     | A     | 15.1988599               | 2.6             |
| 5    | 1      | 4      | 5   | 0     | 5     | E     | 15.1901541               | -2.4            |
| 6    | 1      | 5      | 6   | 0     | 6     | A     | 19.5652793               | 0.7             |
| 2    | 0      | 2      | 1   | 1     | 1     | E     | 7.5619042                | 2.2             |
| 3    | 0      | 3      | 2   | 1     | 2     | A     | 12.5044367               | -1.4            |
| 3    | 0      | 3      | 2   | 1     | 2     | E     | 12.5286458               | 0.2             |
| 4    | 0      | 4      | 3   | 1     | 3     | A     | 17.0948592               | 0.3             |
| 4    | 0      | 4      | 3   | 1     | 3     | E     | 17.1042683               | -1.2            |
| 5    | 0      | 5      | 4   | 1     | 4     | A     | 21.3485818               | 1.0             |
| 5    | 0      | 5      | 4   | 1     | 4     | E     | 21.3505783               | -0.6            |
| 2    | 1      | 1      | 1   | 1     | 0     | A     | 11.1568628               | -2.3            |
| 2    | 1      | 1      | 1   | 1     | 0     | E     | 11.1233457               | 2.6             |
| 3    | 1      | 2      | 2   | 1     | 1     | A     | 16.5001650               | -0.6            |
| 3    | 1      | 2      | 2   | 1     | 1     | E     | 16.4899716               | 0.6             |
| 4    | 1      | 3      | 3   | 1     | 2     | A     | 21.4857135               | -0.7            |
| 4    | 1      | 3      | 3   | 1     | 2     | E     | 21.4766750               | -0.9            |
| 2    | 1      | 2      | 1   | 1     | 1     | A     | 8.9579517                | -3.9            |
| 2    | 1      | 2      | 1   | 1     | 1     | E     | 8.9913411                | 2.1             |
| 3    | 1      | 3      | 2   | 1     | 2     | A     | 13.2613444               | 0.5             |
| 3    | 1      | 3      | 2   | 1     | 2     | E     | 13.2689289               | -1.2            |
| 4    | 1      | 4      | 3   | 1     | 3     | A     | 17.4236462               | 6.2             |
| 4    | 1      | 4      | 3   | 1     | 3     | E     | 17.4246986               | 0.8             |
| 5    | 1      | 5      | 4   | 1     | 4     | A     | 21.4760541               | 0.9             |

| $J'$ | $K_a'$ | $K_c'$ | $J$ | $K_a$ | $K_c$ | $Sym$ | $\nu_{obs} / \text{GHz}$ | $\nu_o - \nu_c$ |
|------|--------|--------|-----|-------|-------|-------|--------------------------|-----------------|
| 5    | 1      | 5      | 4   | 1     | 4     | E     | 21.4743403               | 2.0             |
| 2    | 2      | 1      | 1   | 1     | 0     | A     | 17.8863113               | 0.7             |
| 2    | 2      | 1      | 1   | 1     | 0     | E     | 17.4478081               | 2.9             |
| 2    | 2      | 1      | 2   | 1     | 2     | A     | 10.0278116               | 0.4             |
| 2    | 2      | 1      | 2   | 1     | 2     | E     | 9.6582602                | -3.9            |
| 3    | 2      | 2      | 3   | 1     | 3     | A     | 11.8525559               | 3.0             |
| 3    | 2      | 2      | 3   | 1     | 3     | E     | 11.6880368               | 0.1             |
| 4    | 2      | 3      | 4   | 1     | 4     | A     | 14.2930733               | 2.0             |
| 4    | 2      | 3      | 4   | 1     | 4     | E     | 14.2102101               | 0.3             |
| 5    | 2      | 4      | 5   | 1     | 5     | A     | 17.2639600               | -6.5            |
| 5    | 2      | 4      | 5   | 1     | 5     | E     | 17.2057869               | 3.7             |

**Table S13:** Observed frequencies ( $\nu_{obs}$ ) of the  $^{13}\text{C}(9)$  isotopologues of 2MTP.  $J$ ,  $K_a$  and  $K_c$  are the quantum numbers for an asymmetric top.  $Sym$  is for the respective torsional A or E species. Observed minus calculated ( $\nu_o - \nu_c$ ) values (in kHz) as obtained after a fit with the program *XIAM*.

| $J'$ | $K_a'$ | $K_c'$ | $J$ | $K_a$ | $K_c$ | $Sym$ | $\nu_{obs} / \text{GHz}$ | $\nu_o - \nu_c$ |
|------|--------|--------|-----|-------|-------|-------|--------------------------|-----------------|
| 2    | 0      | 2      | 1   | 0     | 1     | A     | 9.6247952                | 1.3             |
| 2    | 0      | 2      | 1   | 0     | 1     | E     | 9.6227892                | -0.2            |
| 3    | 0      | 3      | 2   | 0     | 2     | A     | 13.8202740               | 0.6             |
| 3    | 0      | 3      | 2   | 0     | 2     | E     | 13.8148066               | -0.3            |
| 4    | 0      | 4      | 3   | 0     | 3     | A     | 17.6810627               | 0.0             |
| 4    | 0      | 4      | 3   | 0     | 3     | E     | 17.6740010               | -0.1            |
| 5    | 0      | 5      | 4   | 0     | 4     | A     | 21.4681599               | -0.7            |
| 5    | 0      | 5      | 4   | 0     | 4     | E     | 21.4618164               | 0.1             |
| 2    | 1      | 2      | 1   | 0     | 1     | A     | 11.1427421               | -1.1            |
| 2    | 1      | 2      | 1   | 0     | 1     | E     | 11.1101997               | -6.0            |
| 3    | 1      | 3      | 2   | 0     | 2     | A     | 14.6278394               | 0.9             |
| 3    | 1      | 3      | 2   | 0     | 2     | E     | 14.6051763               | 2.6             |
| 4    | 1      | 4      | 3   | 0     | 3     | E     | 18.0260233               | 4.0             |
| 5    | 1      | 5      | 4   | 0     | 4     | A     | 21.6121059               | 0.0             |
| 5    | 1      | 5      | 4   | 0     | 4     | E     | 21.6017124               | 2.5             |
| 4    | 1      | 3      | 4   | 0     | 4     | A     | 10.7129629               | 1.7             |
| 4    | 1      | 3      | 4   | 0     | 4     | E     | 10.7123286               | 7.8             |
| 5    | 1      | 4      | 5   | 0     | 5     | A     | 14.9119090               | -1.1            |
| 5    | 1      | 4      | 5   | 0     | 5     | E     | 14.9041995               | -2.0            |
| 2    | 0      | 2      | 1   | 1     | 1     | A     | 7.3322625                | -2.1            |
| 3    | 0      | 3      | 2   | 1     | 2     | A     | 12.3023249               | 0.9             |
| 3    | 0      | 3      | 2   | 1     | 2     | E     | 12.3273959               | 5.3             |
| 4    | 0      | 4      | 3   | 1     | 3     | A     | 16.8734983               | 0.7             |
| 4    | 0      | 4      | 3   | 1     | 3     | E     | 16.8836324               | -1.9            |
| 5    | 0      | 5      | 4   | 1     | 4     | A     | 21.1072765               | -0.7            |
| 5    | 0      | 5      | 4   | 1     | 4     | E     | 21.1097938               | -4.3            |

| $J'$ | $K_a'$ | $K_c'$ | $J$ | $K_a$ | $K_c$ | $Sym$ | $\nu_{obs} / \text{GHz}$ | $\nu_o - \nu_c$ |
|------|--------|--------|-----|-------|-------|-------|--------------------------|-----------------|
| 2    | 1      | 1      | 1   | 1     | 0     | A     | 10.9922329               | -5.6            |
| 3    | 1      | 2      | 2   | 1     | 1     | A     | 16.2692213               | 2.5             |
| 3    | 1      | 2      | 2   | 1     | 1     | E     | 16.2589401               | -9.2            |
| 4    | 1      | 3      | 3   | 1     | 2     | A     | 21.2140914               | 0.3             |
| 2    | 1      | 2      | 1   | 1     | 1     | A     | 8.8502080                | -6.0            |
| 3    | 1      | 3      | 2   | 1     | 2     | A     | 13.1098899               | 0.7             |
| 3    | 1      | 3      | 2   | 1     | 2     | E     | 13.1177638               | 6.4             |
| 4    | 1      | 4      | 3   | 1     | 3     | A     | 17.2343829               | 2.0             |
| 4    | 1      | 4      | 3   | 1     | 3     | E     | 17.2356533               | 0.9             |
| 5    | 1      | 5      | 4   | 1     | 4     | A     | 21.2512231               | 0.5             |
| 5    | 1      | 5      | 4   | 1     | 4     | E     | 21.2496902               | -1.5            |
| 2    | 2      | 1      | 1   | 1     | 0     | A     | 17.8697656               | 1.5             |
| 2    | 2      | 1      | 1   | 1     | 0     | E     | 17.4236401               | 1.4             |
| 3    | 2      | 2      | 3   | 1     | 3     | A     | 11.8624793               | -3.9            |
| 4    | 2      | 3      | 4   | 1     | 4     | A     | 14.2355208               | 1.8             |
| 4    | 2      | 3      | 4   | 1     | 4     | E     | 14.1497478               | -1.5            |
